# Supplementary material for: Seed size evolution and biogeography of Plukenetia (Euphorbiaceae), a pantropical genus with traditionally cultivated oilseed species
Source: Springer Nature journal article supplement (doi:10.1186/s12862-018-1308-9), 2019-01-22

**Fig. S1** Primer map for new (*KEA1* introns 11 and 17, *TEB* exon 17) and redesigned (*ETS*, *matK*) molecular markers.

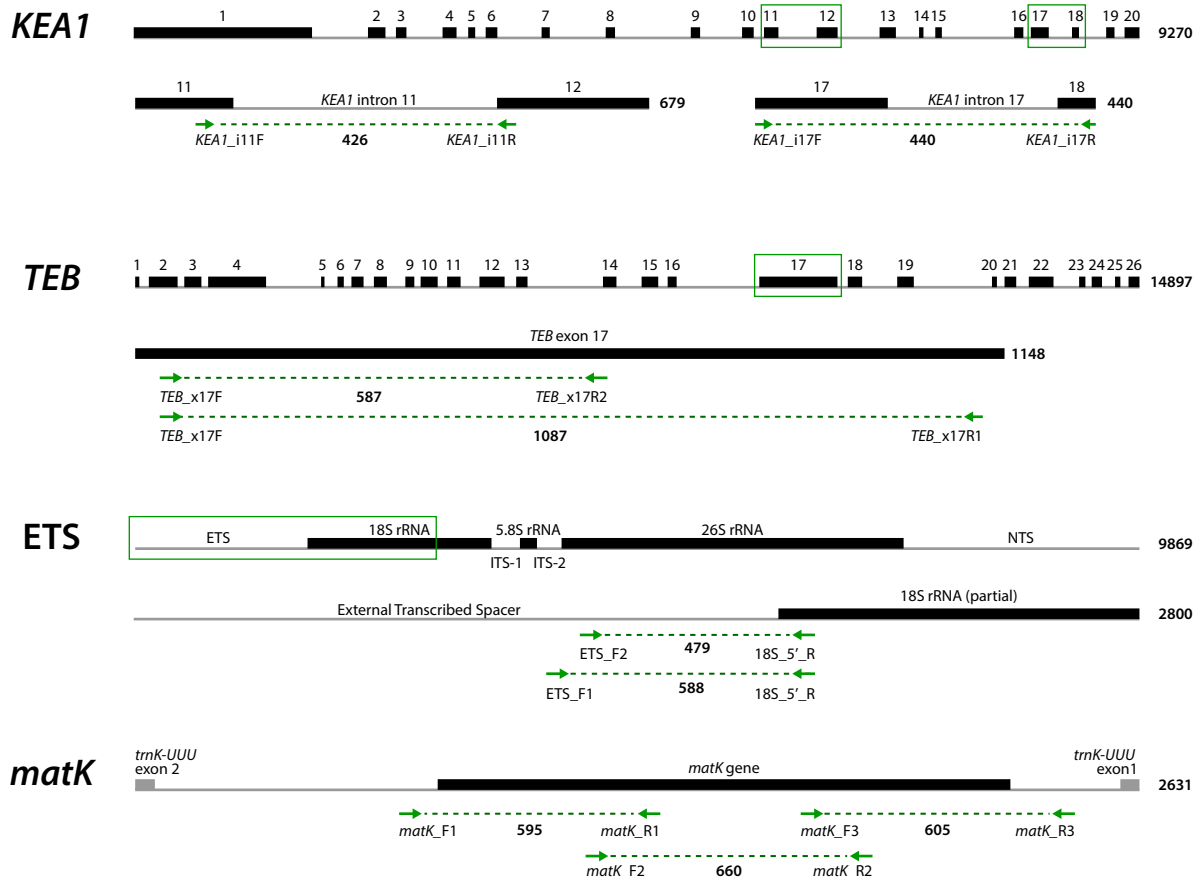

**Fig. S2 a**  
nrDNA ETS

HKY+G

500 ML Bootstrap Replicates

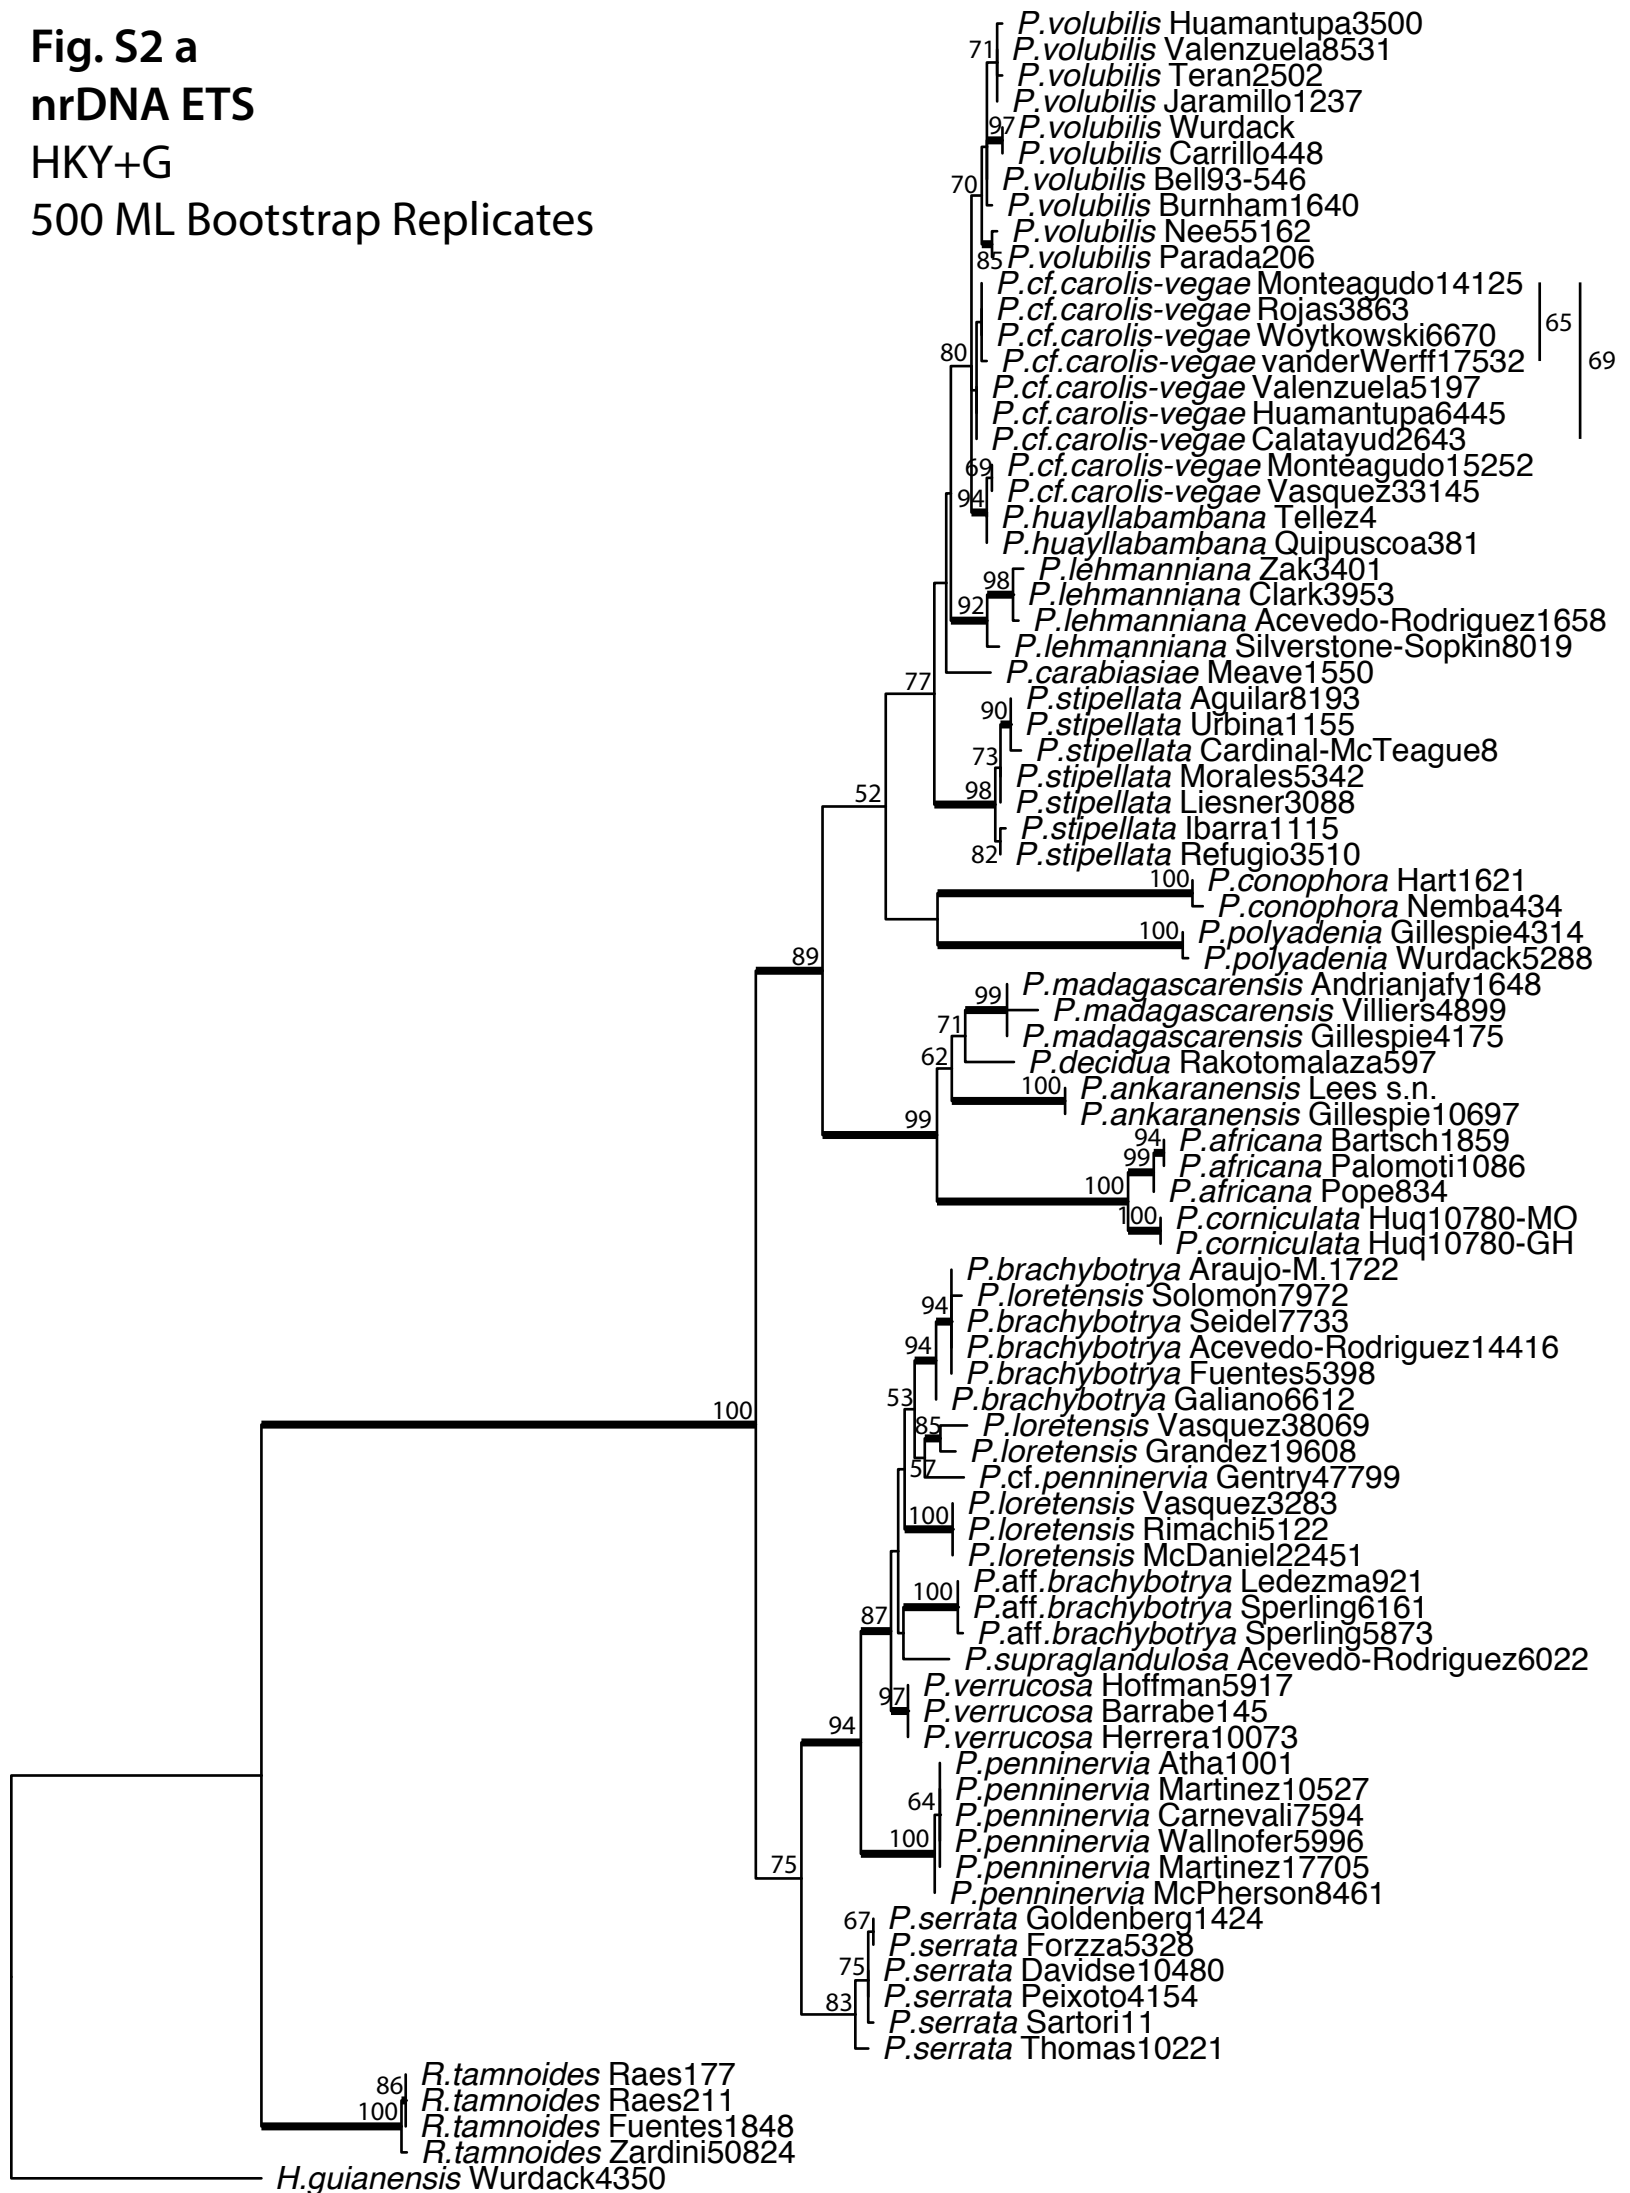

**Fig. S2 b**  
nrDNA ITS

GTR+I+G

500 ML Bootstrap Replicates

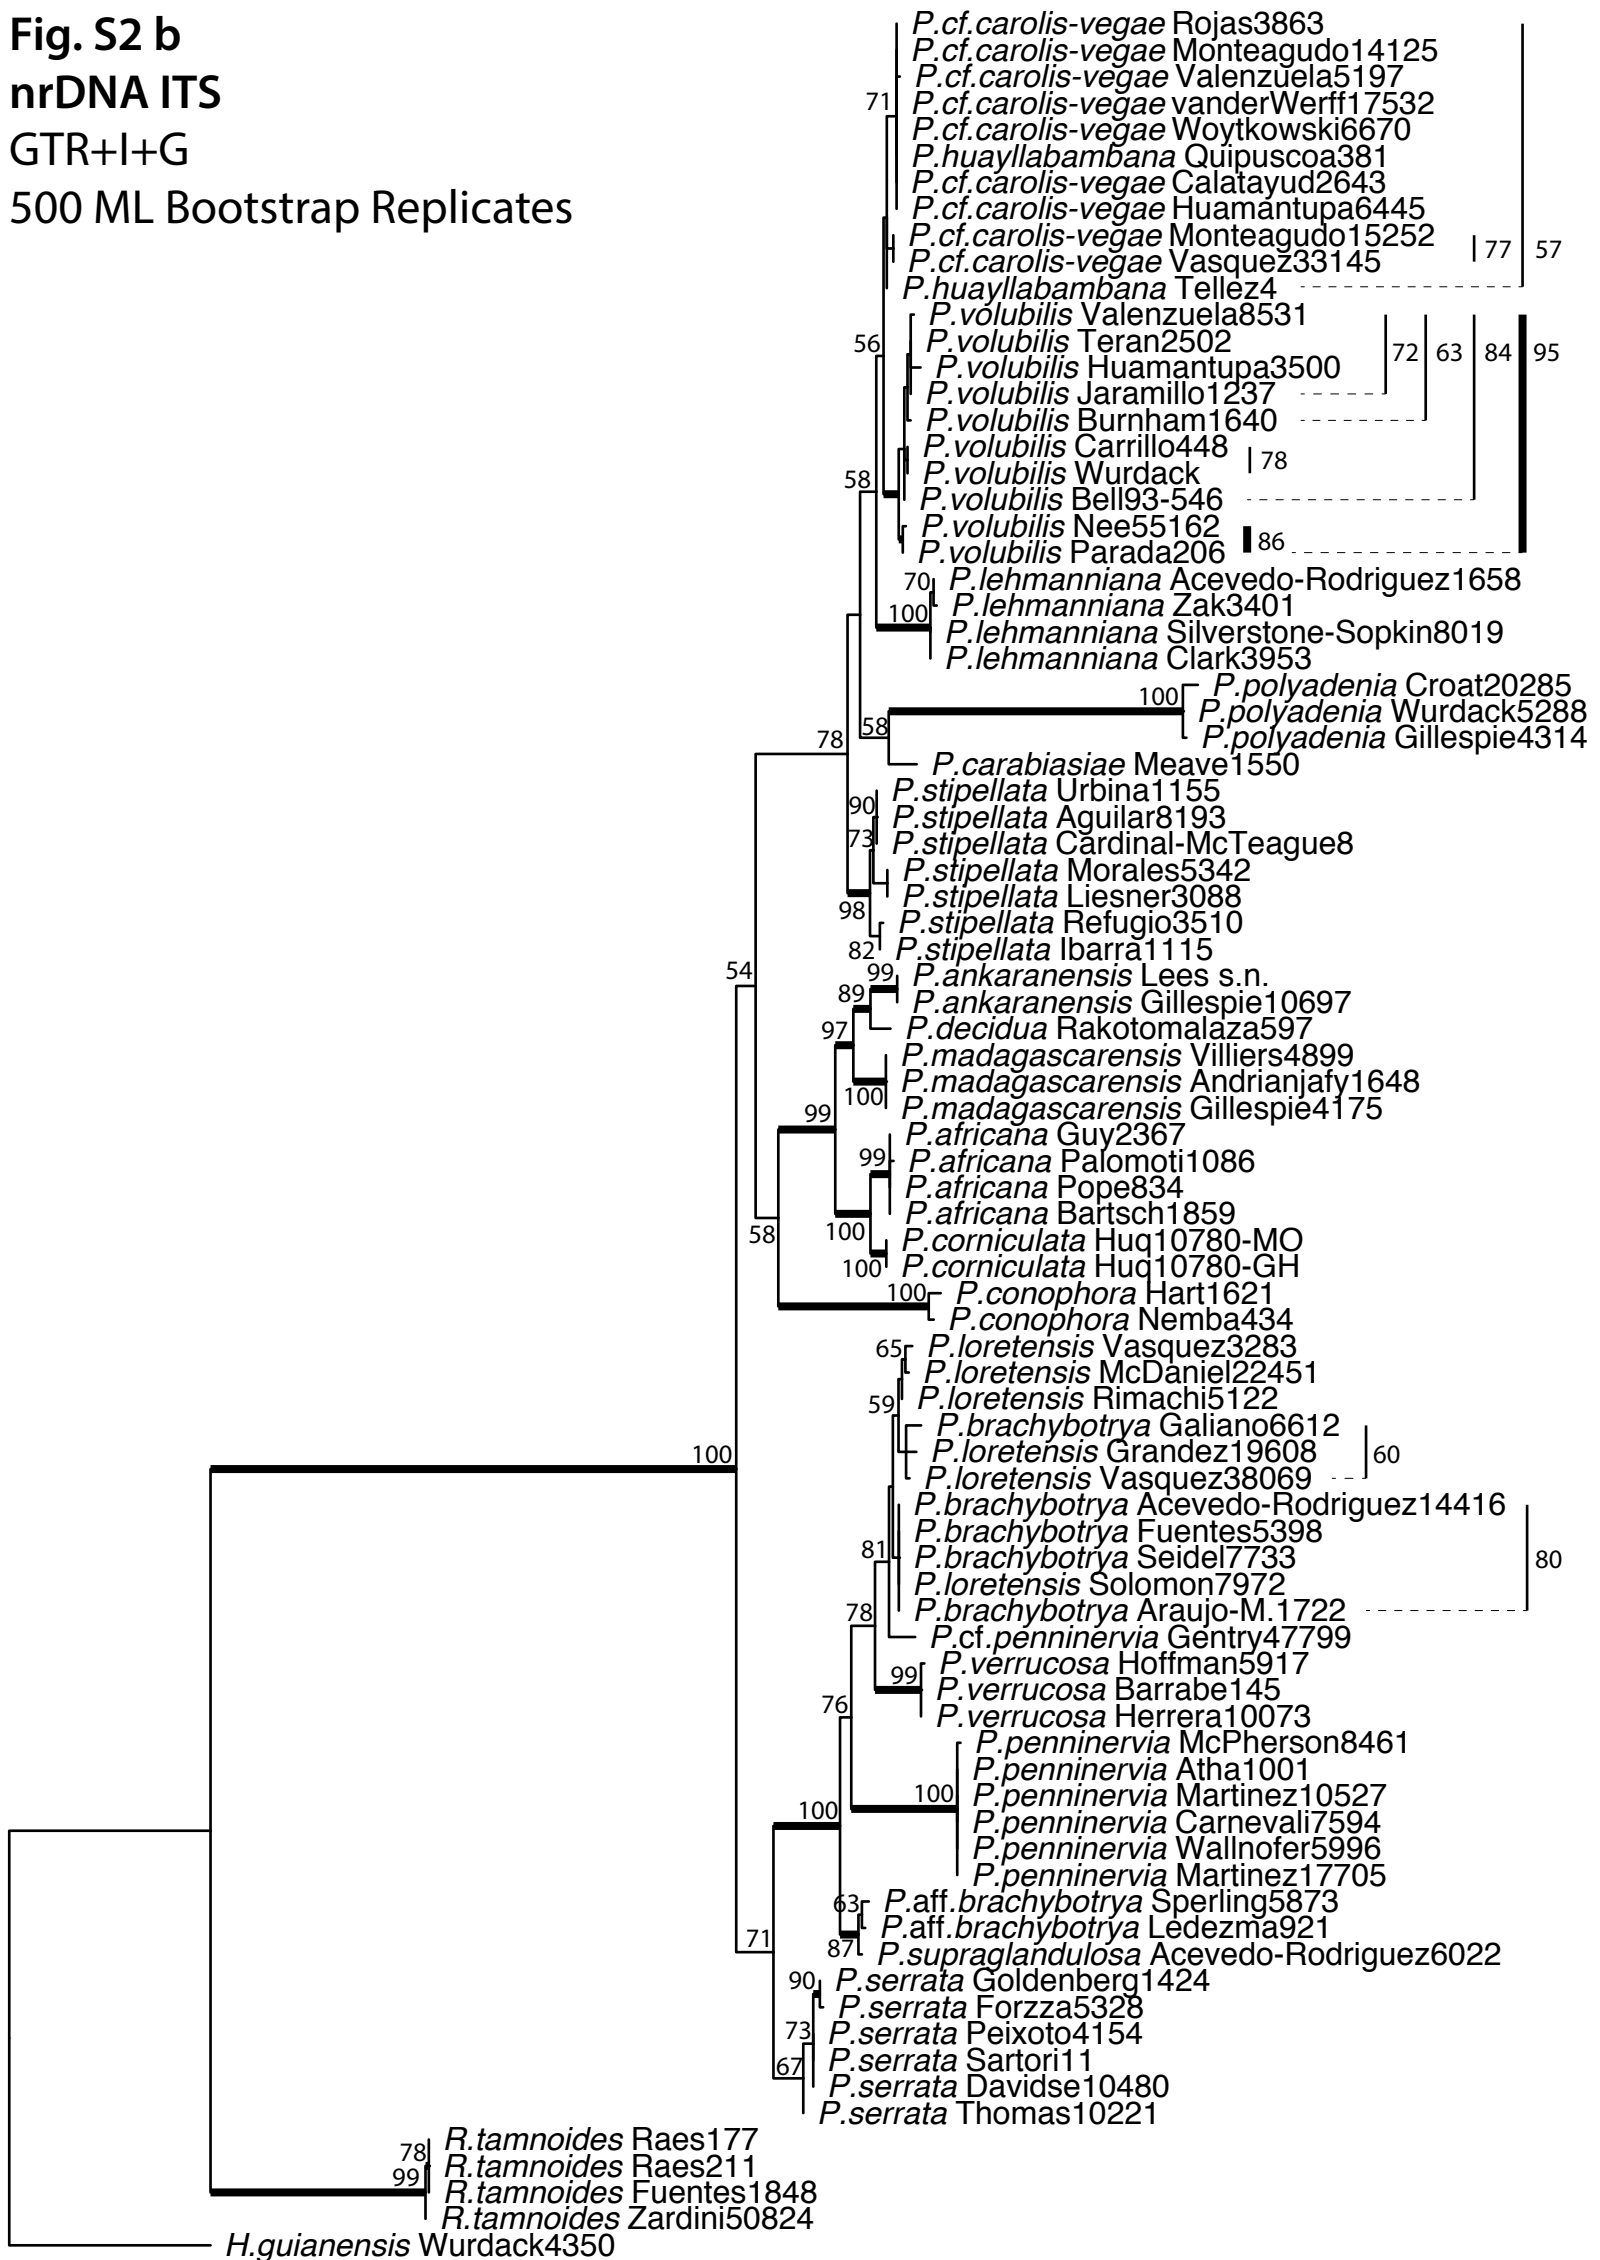

Fig. S2 c

nDNA KEA1 intron 11

GTR+G

500 ML Bootstrap Replicates

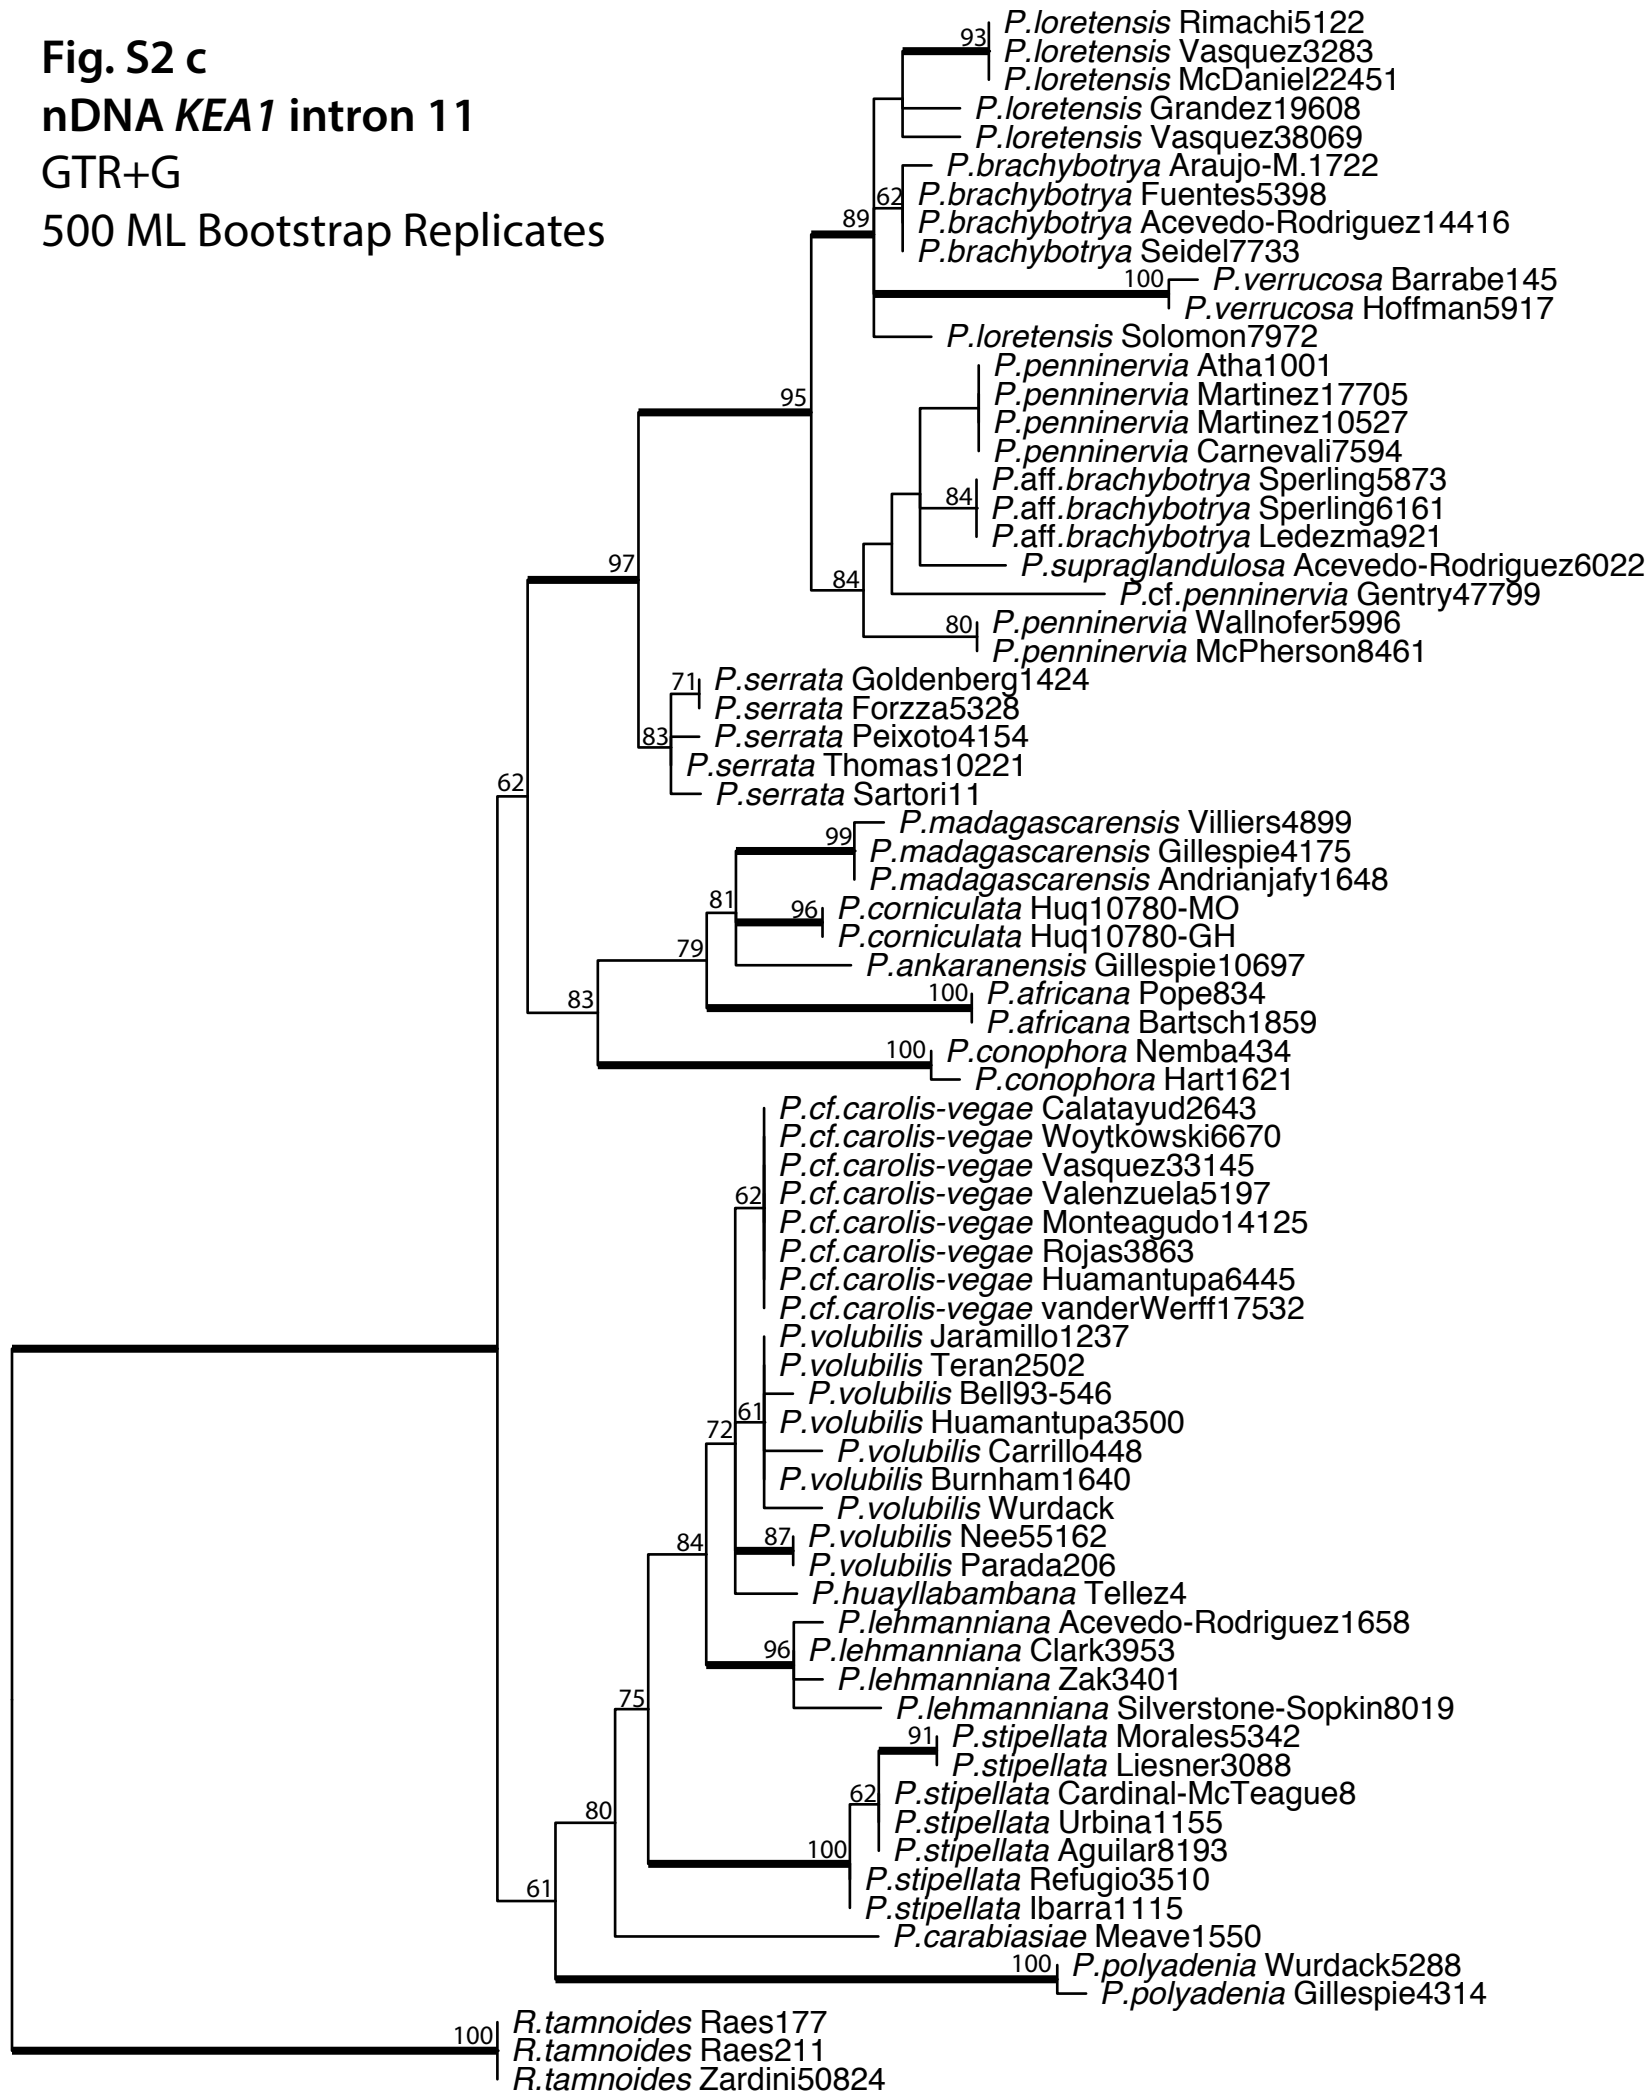

0.02

**Fig. S2 d**  
**nDNA KEA1 intron 17**  
 HKY+I  
 500 ML Bootstrap Replicates

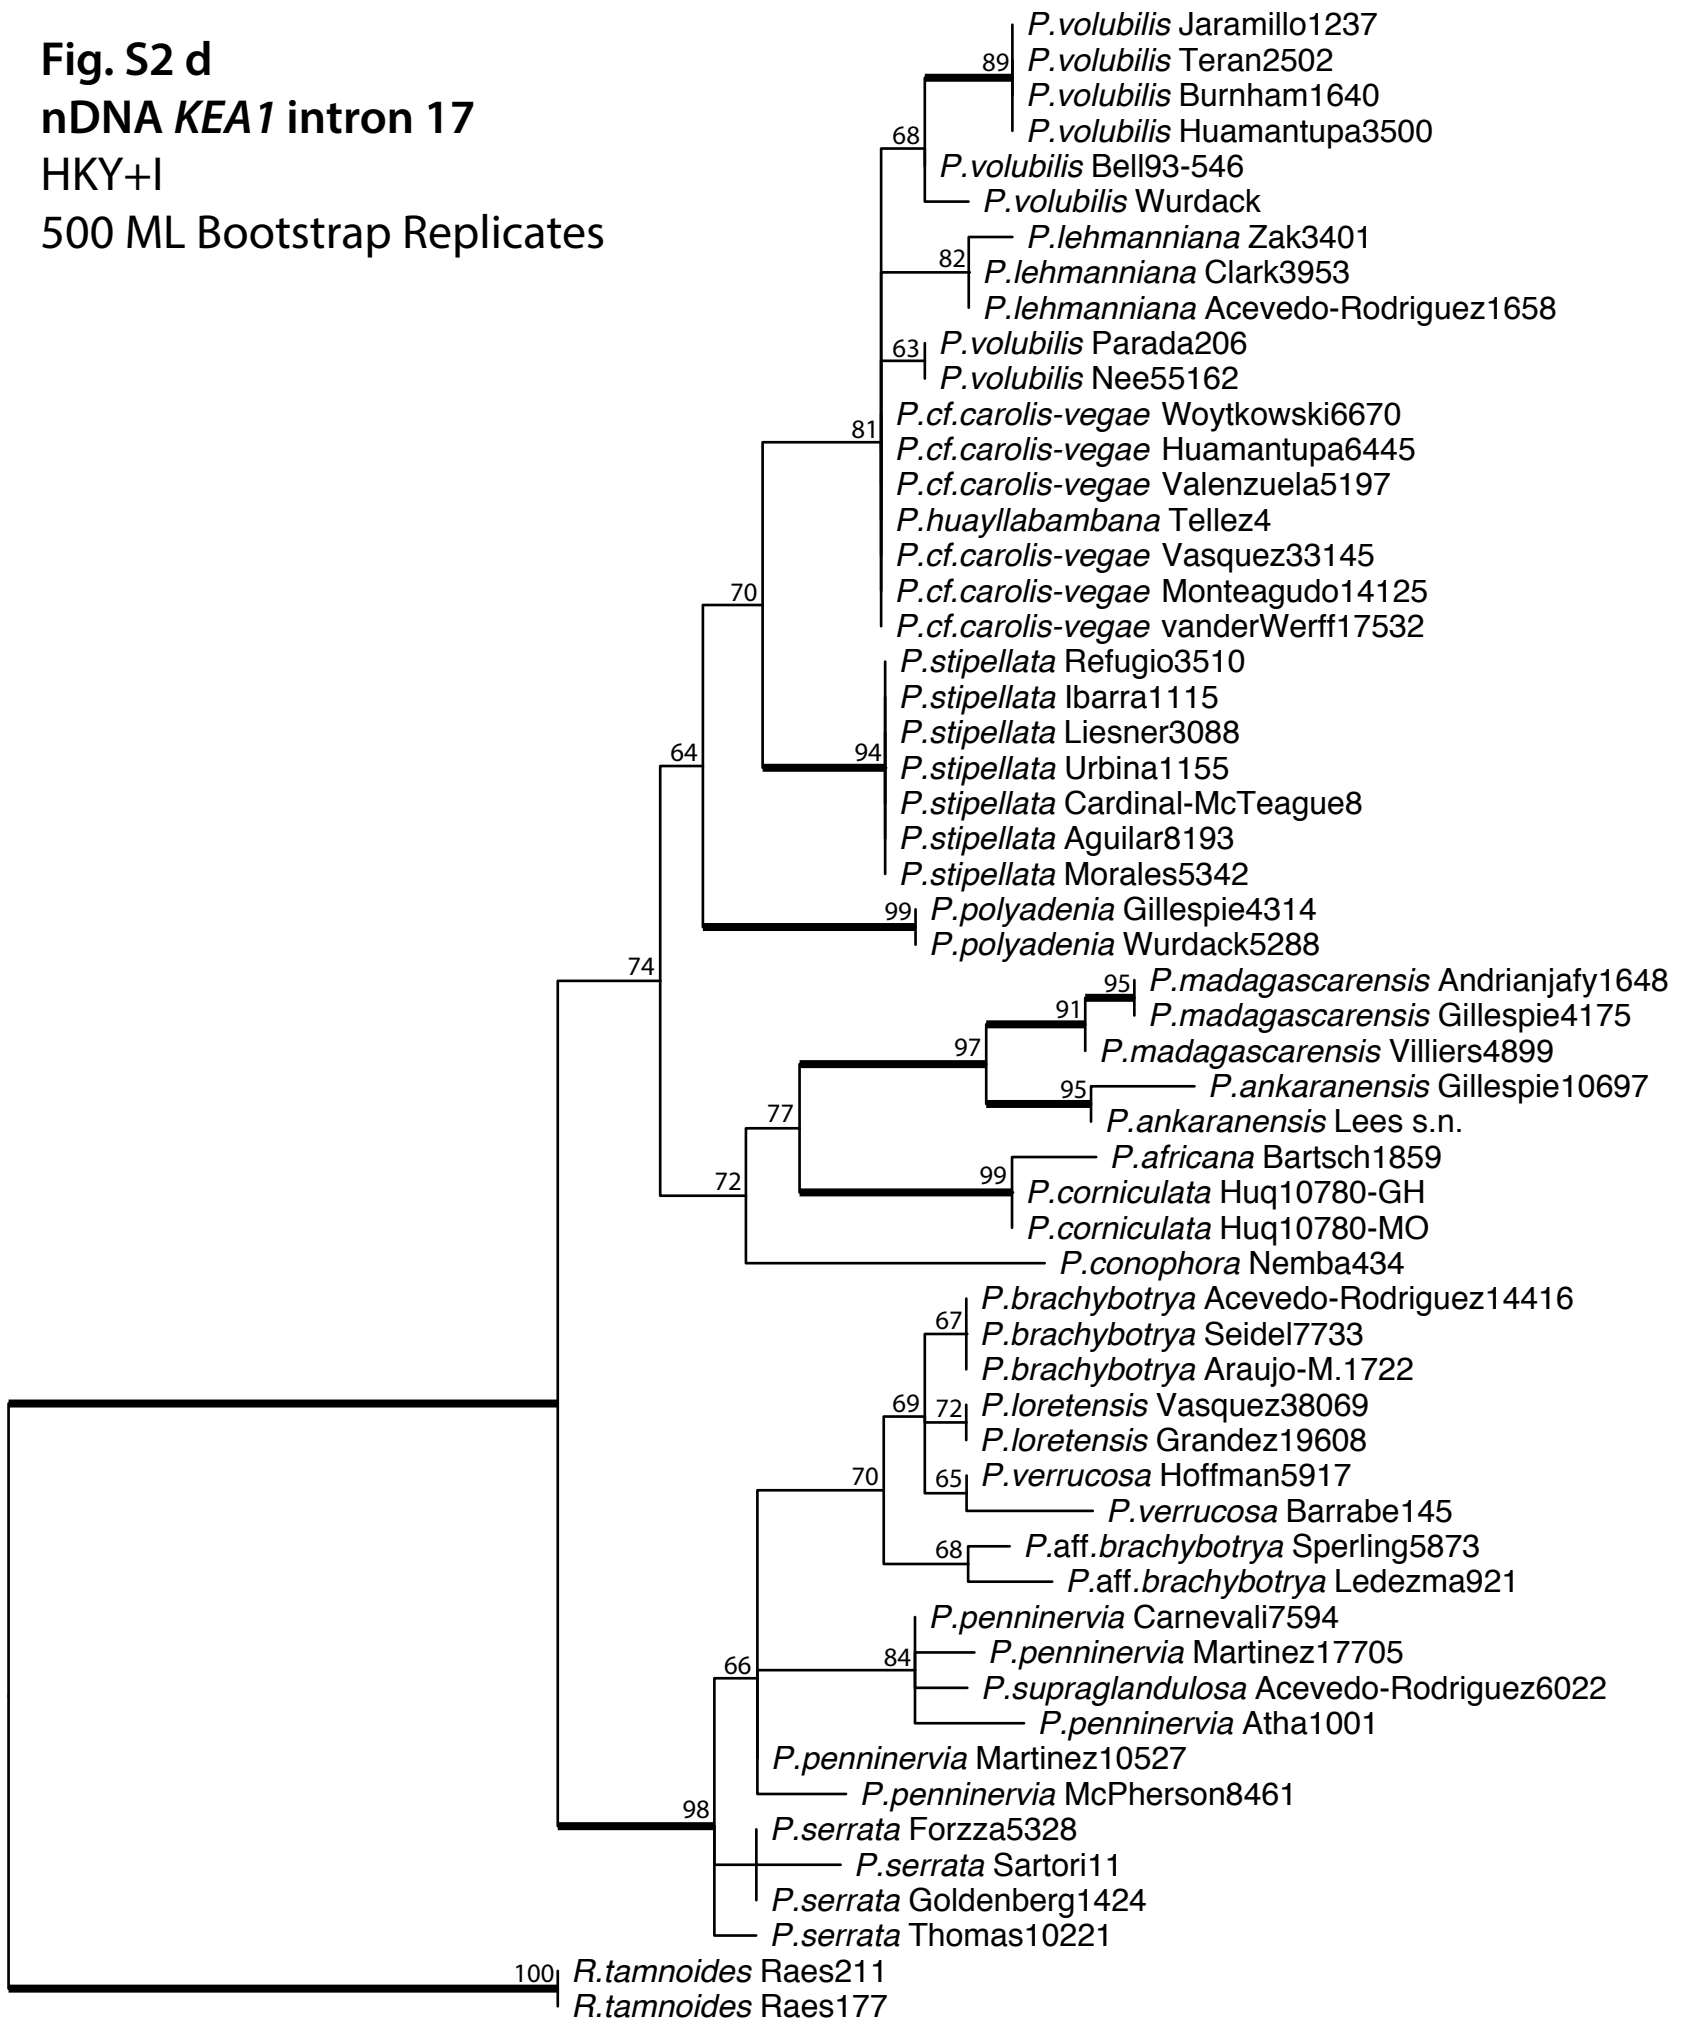

0.01

Fig. S2 e

nDNA *TEB* exon 17

HKY+I

500 ML Bootstrap Replicates

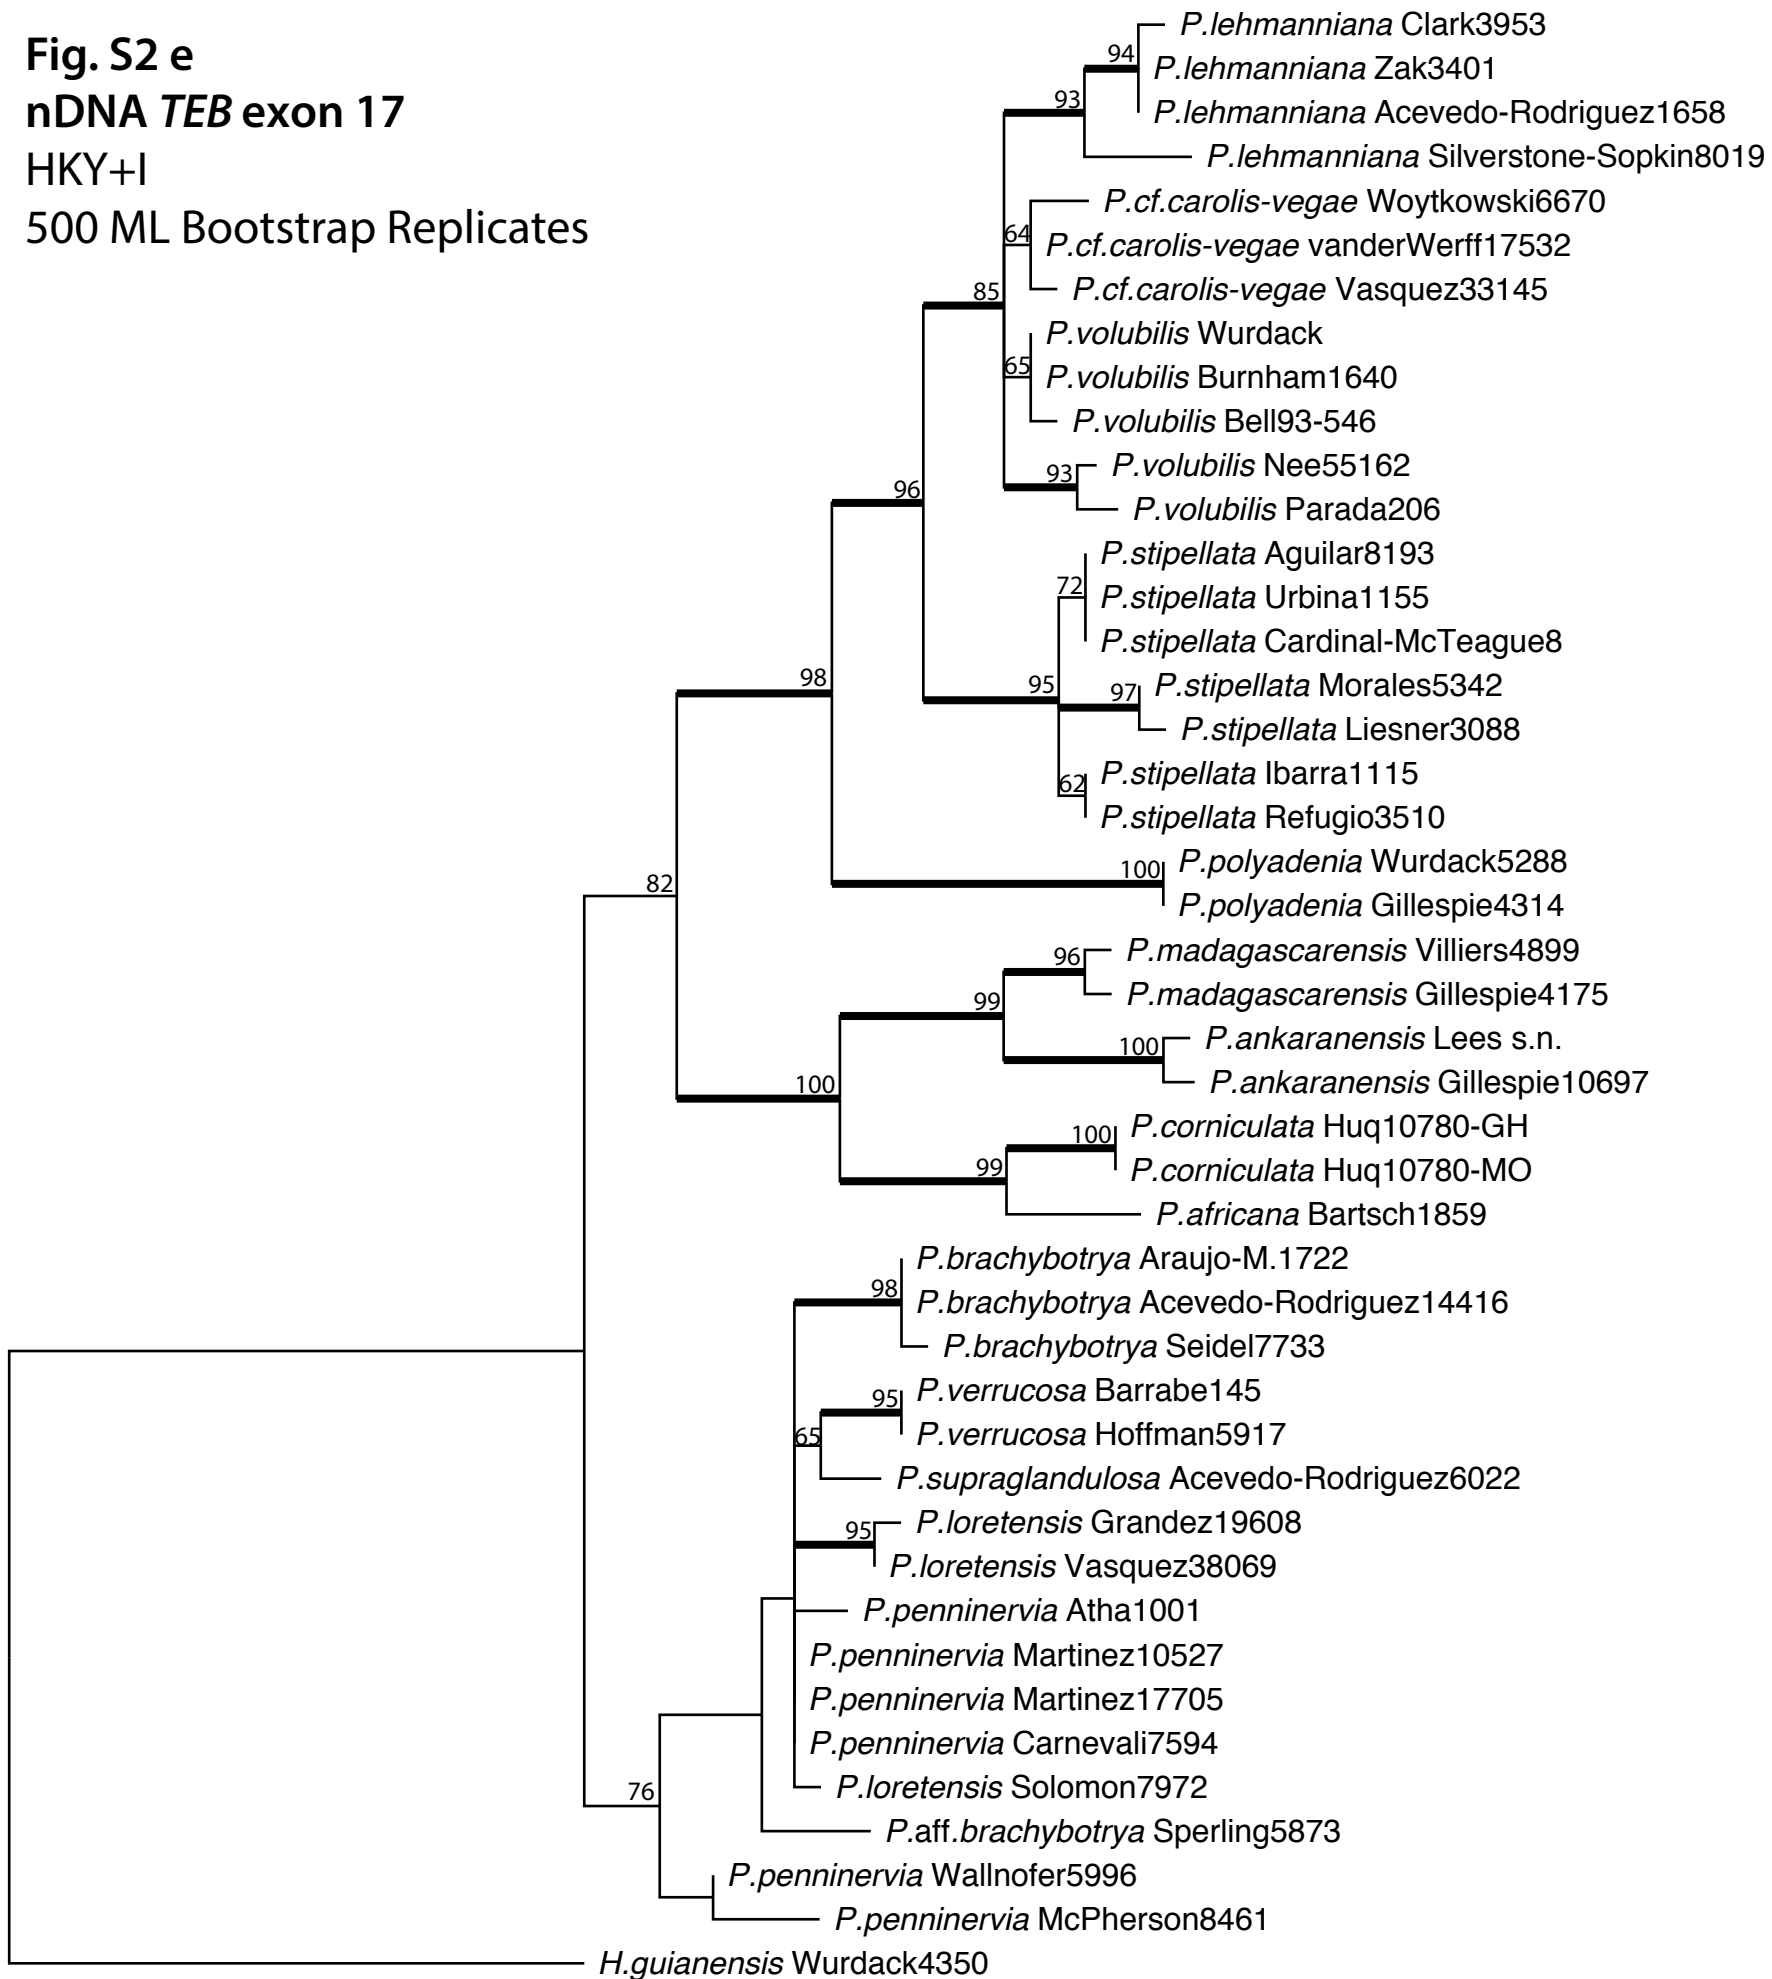

0.0080

Fig. S2 f

cpDNA *matK*

GTR+G

500 ML Bootstrap Replicates

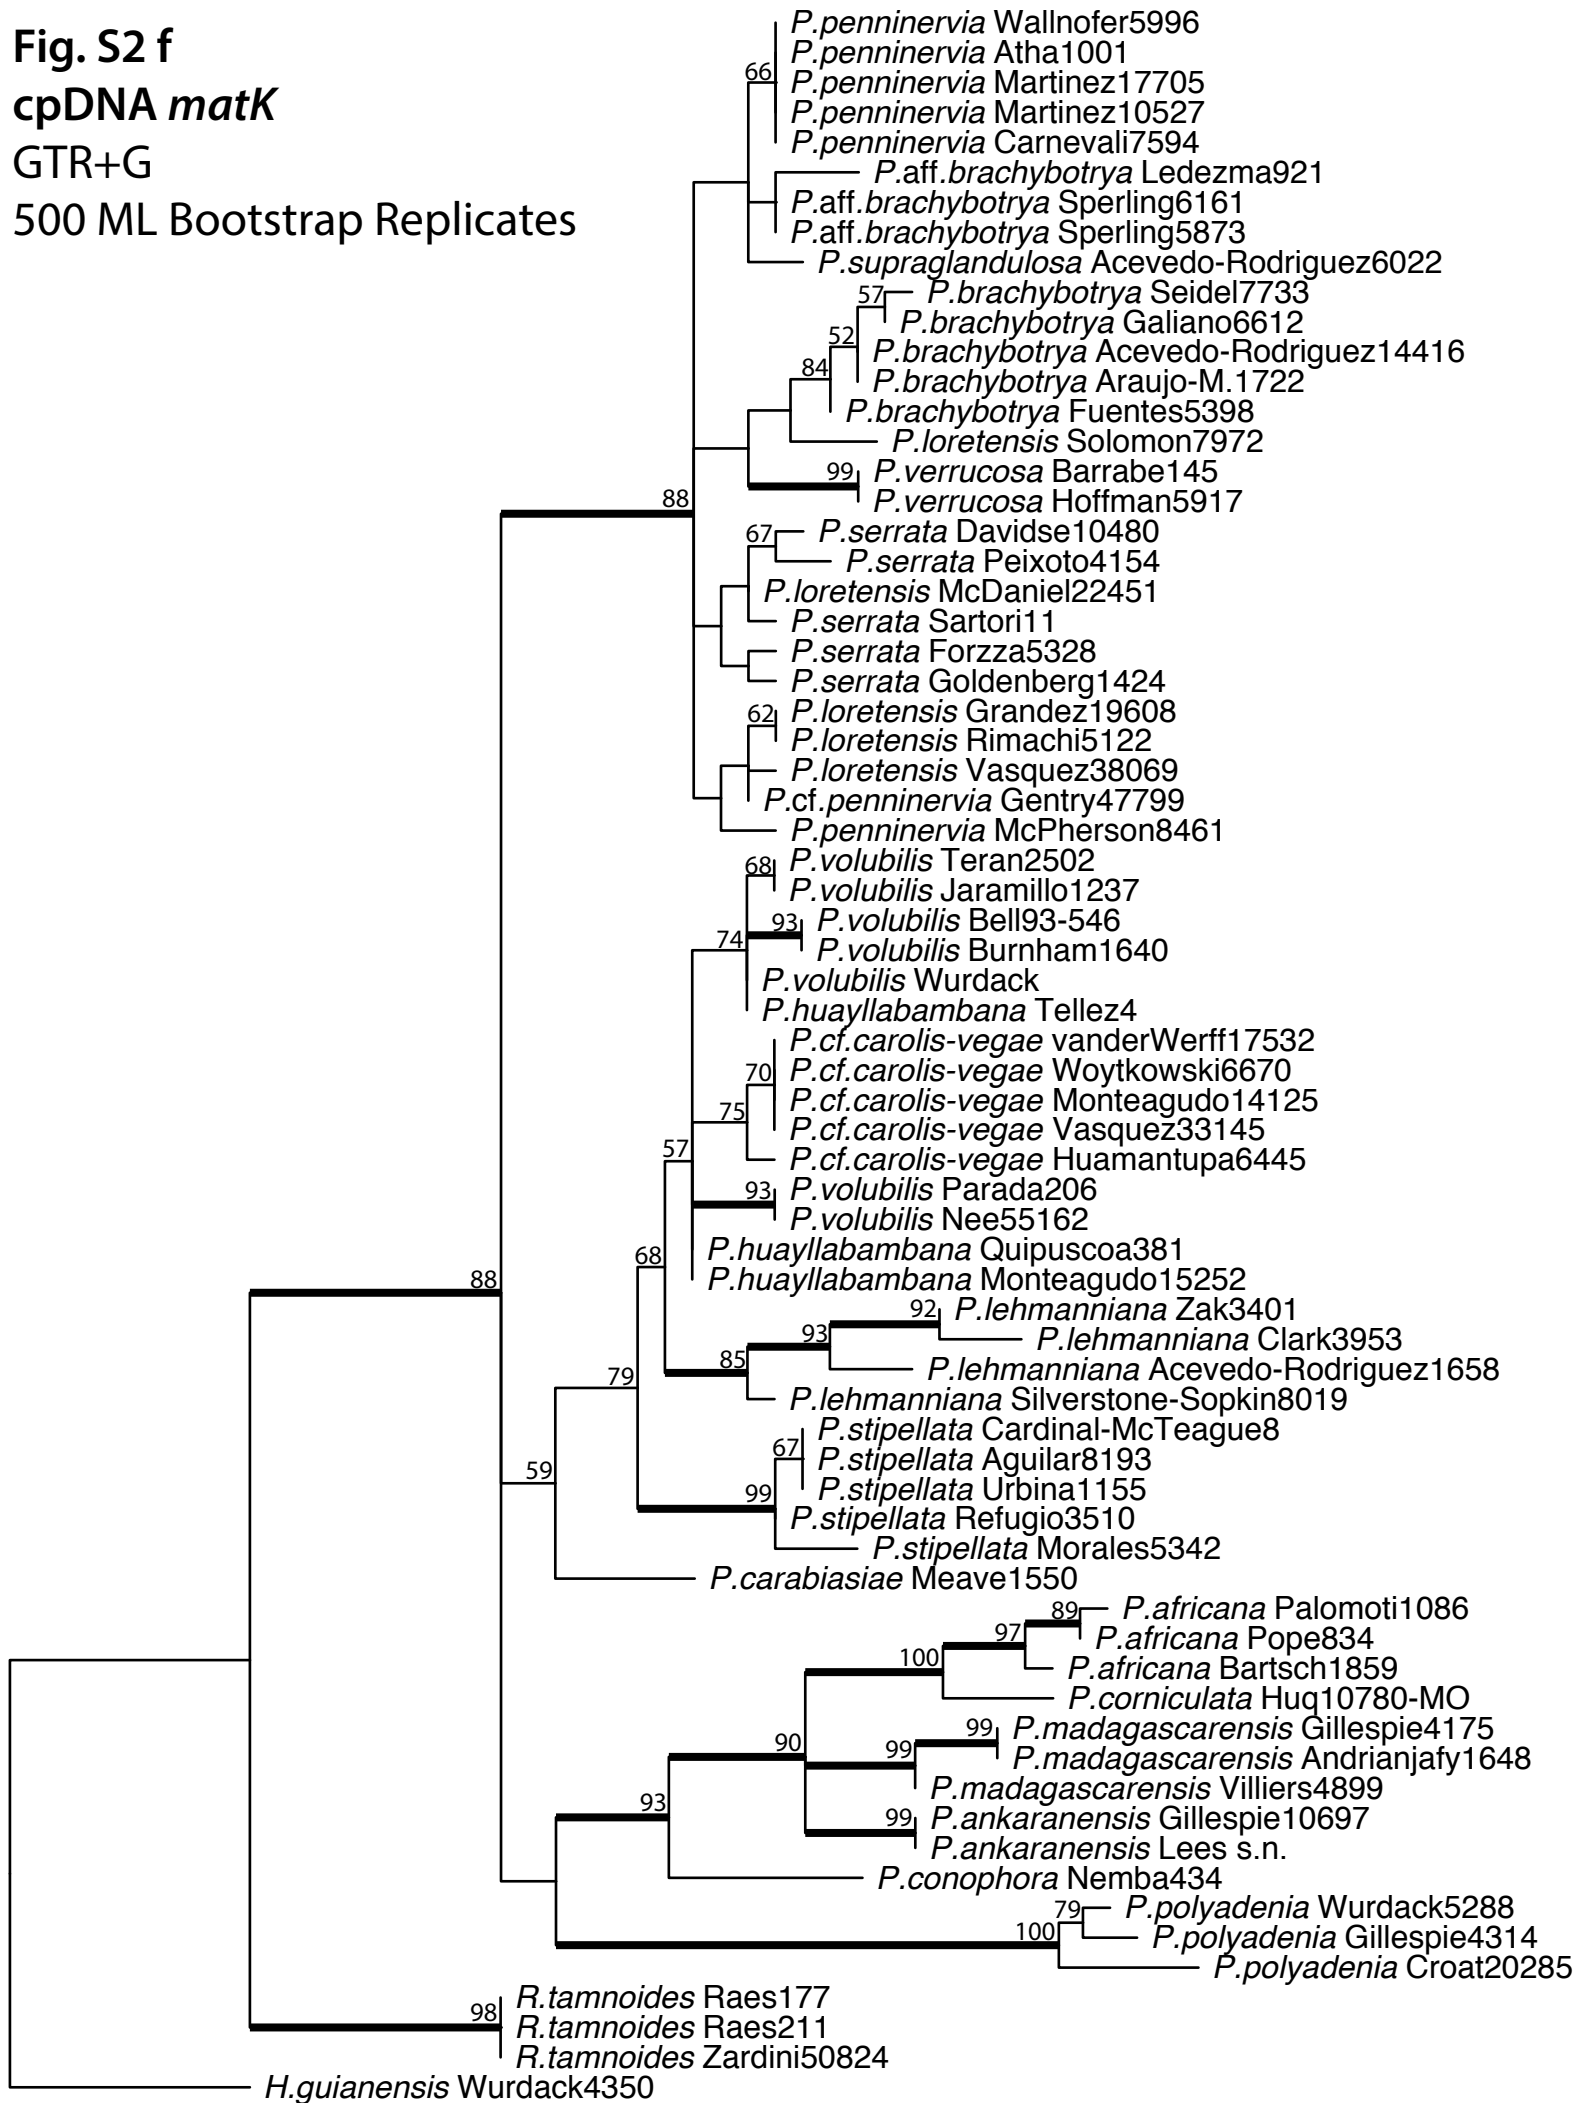

0.0030

**Fig. S2 g**  
**cpDNA *ndhF***

GTR+I+G

500 ML Bootstrap Replicates

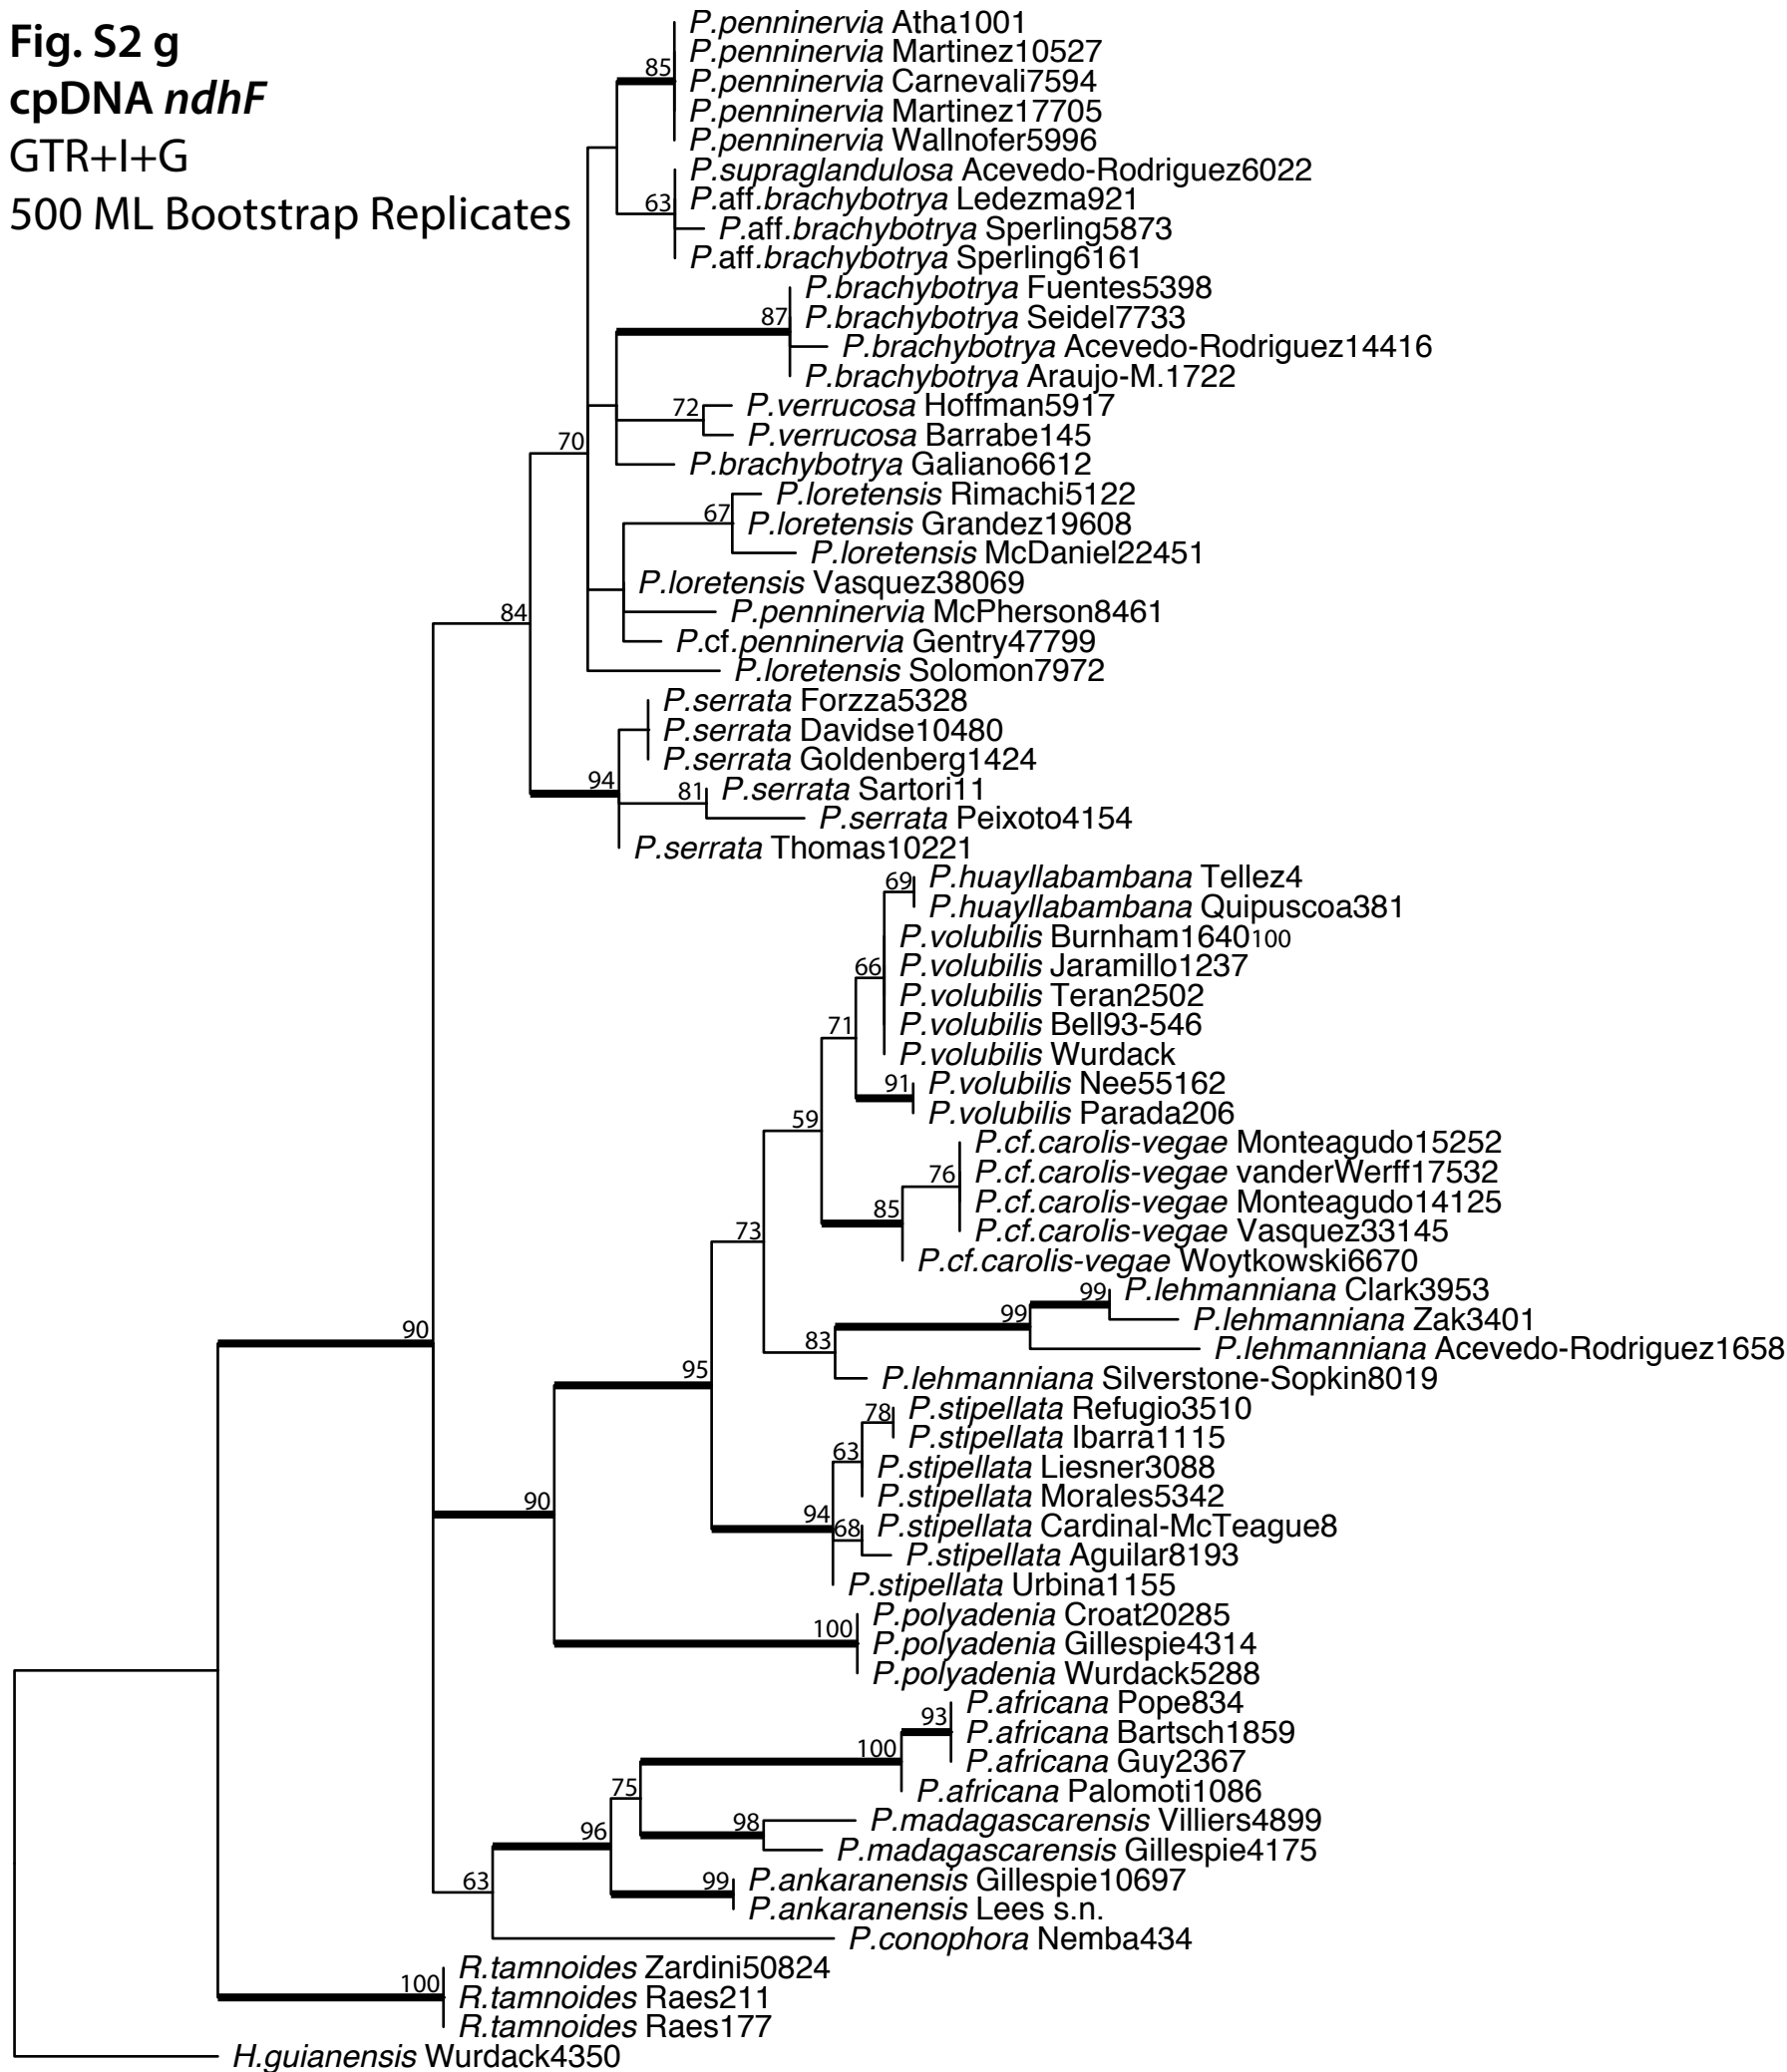

0.0050



**Fig. S3** Bayesian maximum clade credibility tree based on (a) plastid DNA (cpDNA) two marker, 74 accession dataset, and (b) nuclear DNA (nDNA) five marker, 86 accession dataset, for *Plukenetia* and Plukenetiinae outgroups. Maximum parsimony bootstrap percentage (MPBP) and Bayesian posterior probability (PP) support values > 50% are indicated on each branch. Branches in bold indicate strong support ( $\geq 85$  MPBP and  $\geq 0.95$  PP). Grey boxes highlight strongly supported topological incongruences.

**a) cpDNA**

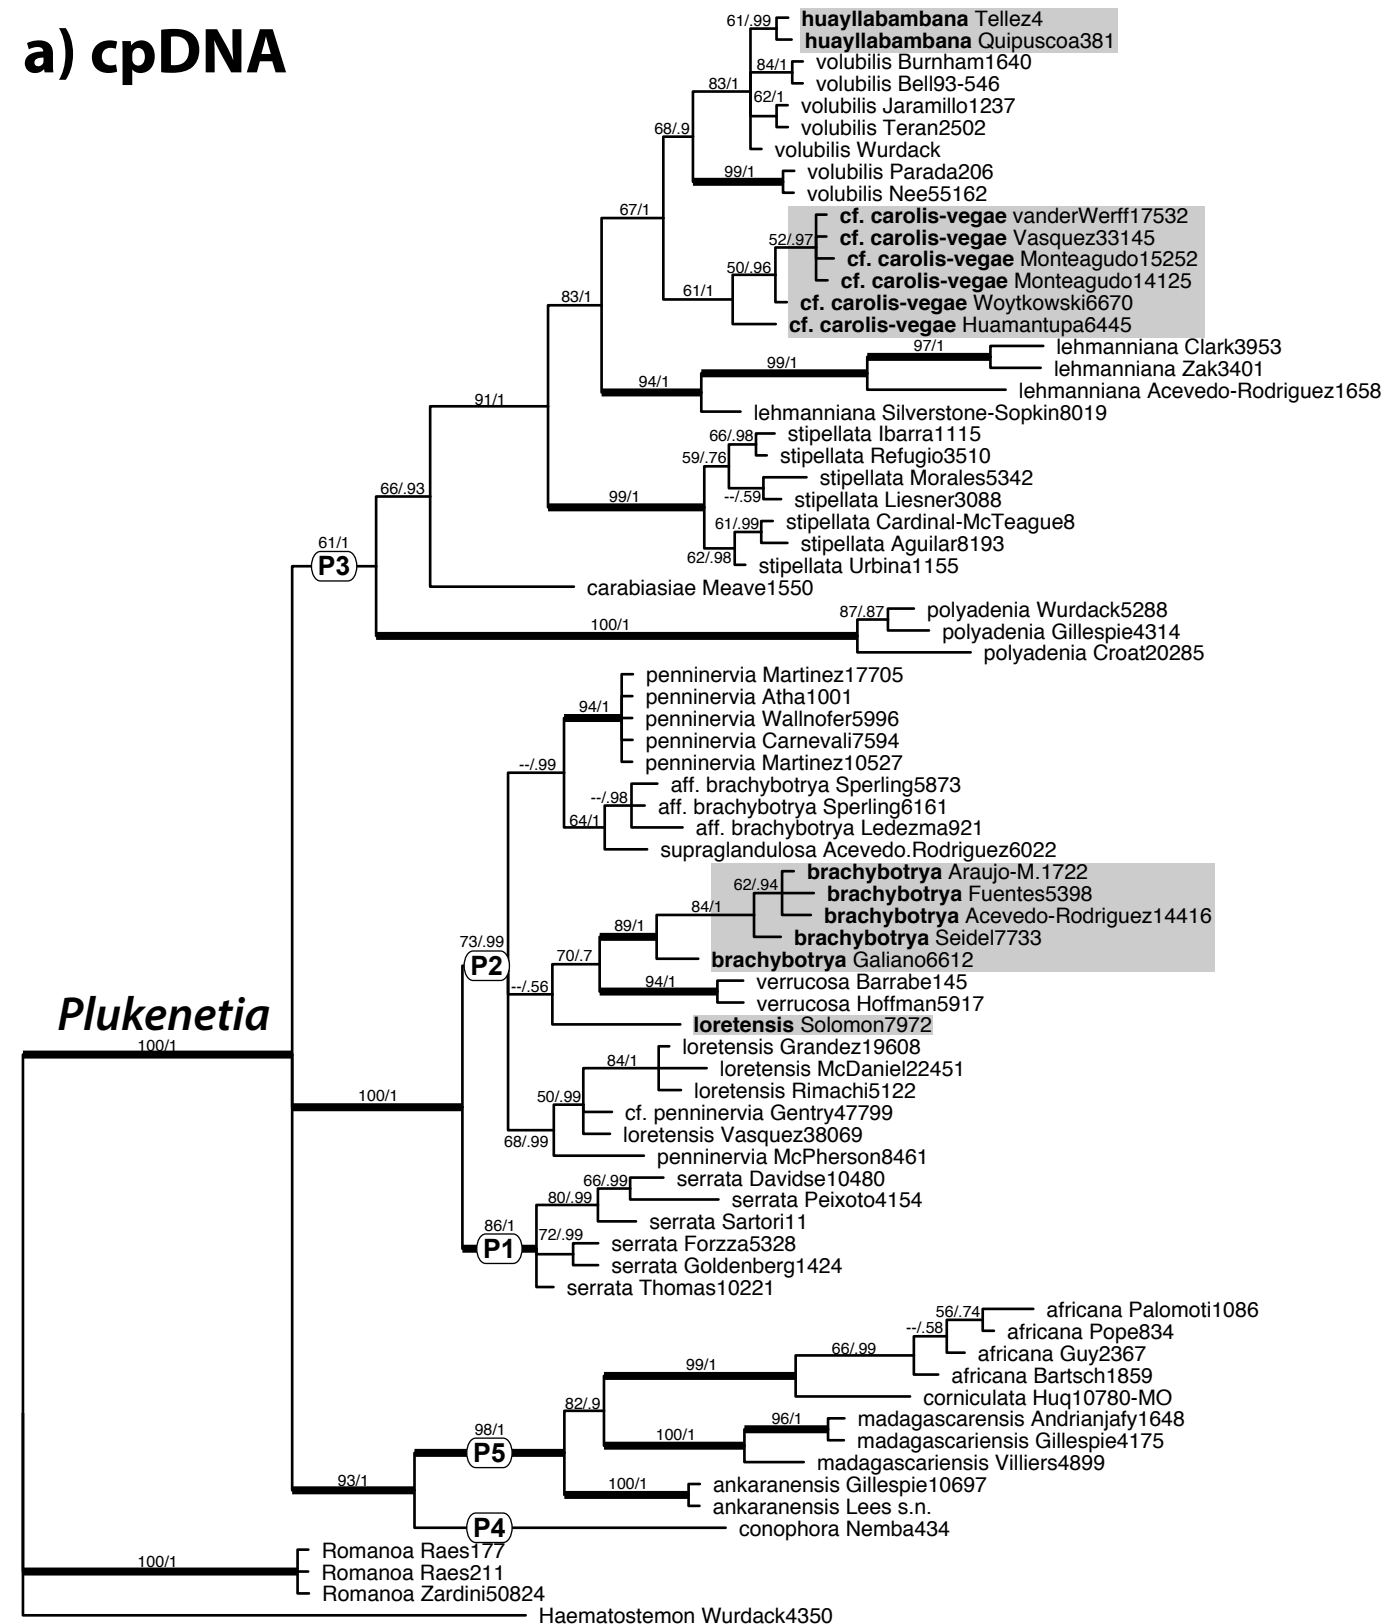

**b) nDNA**

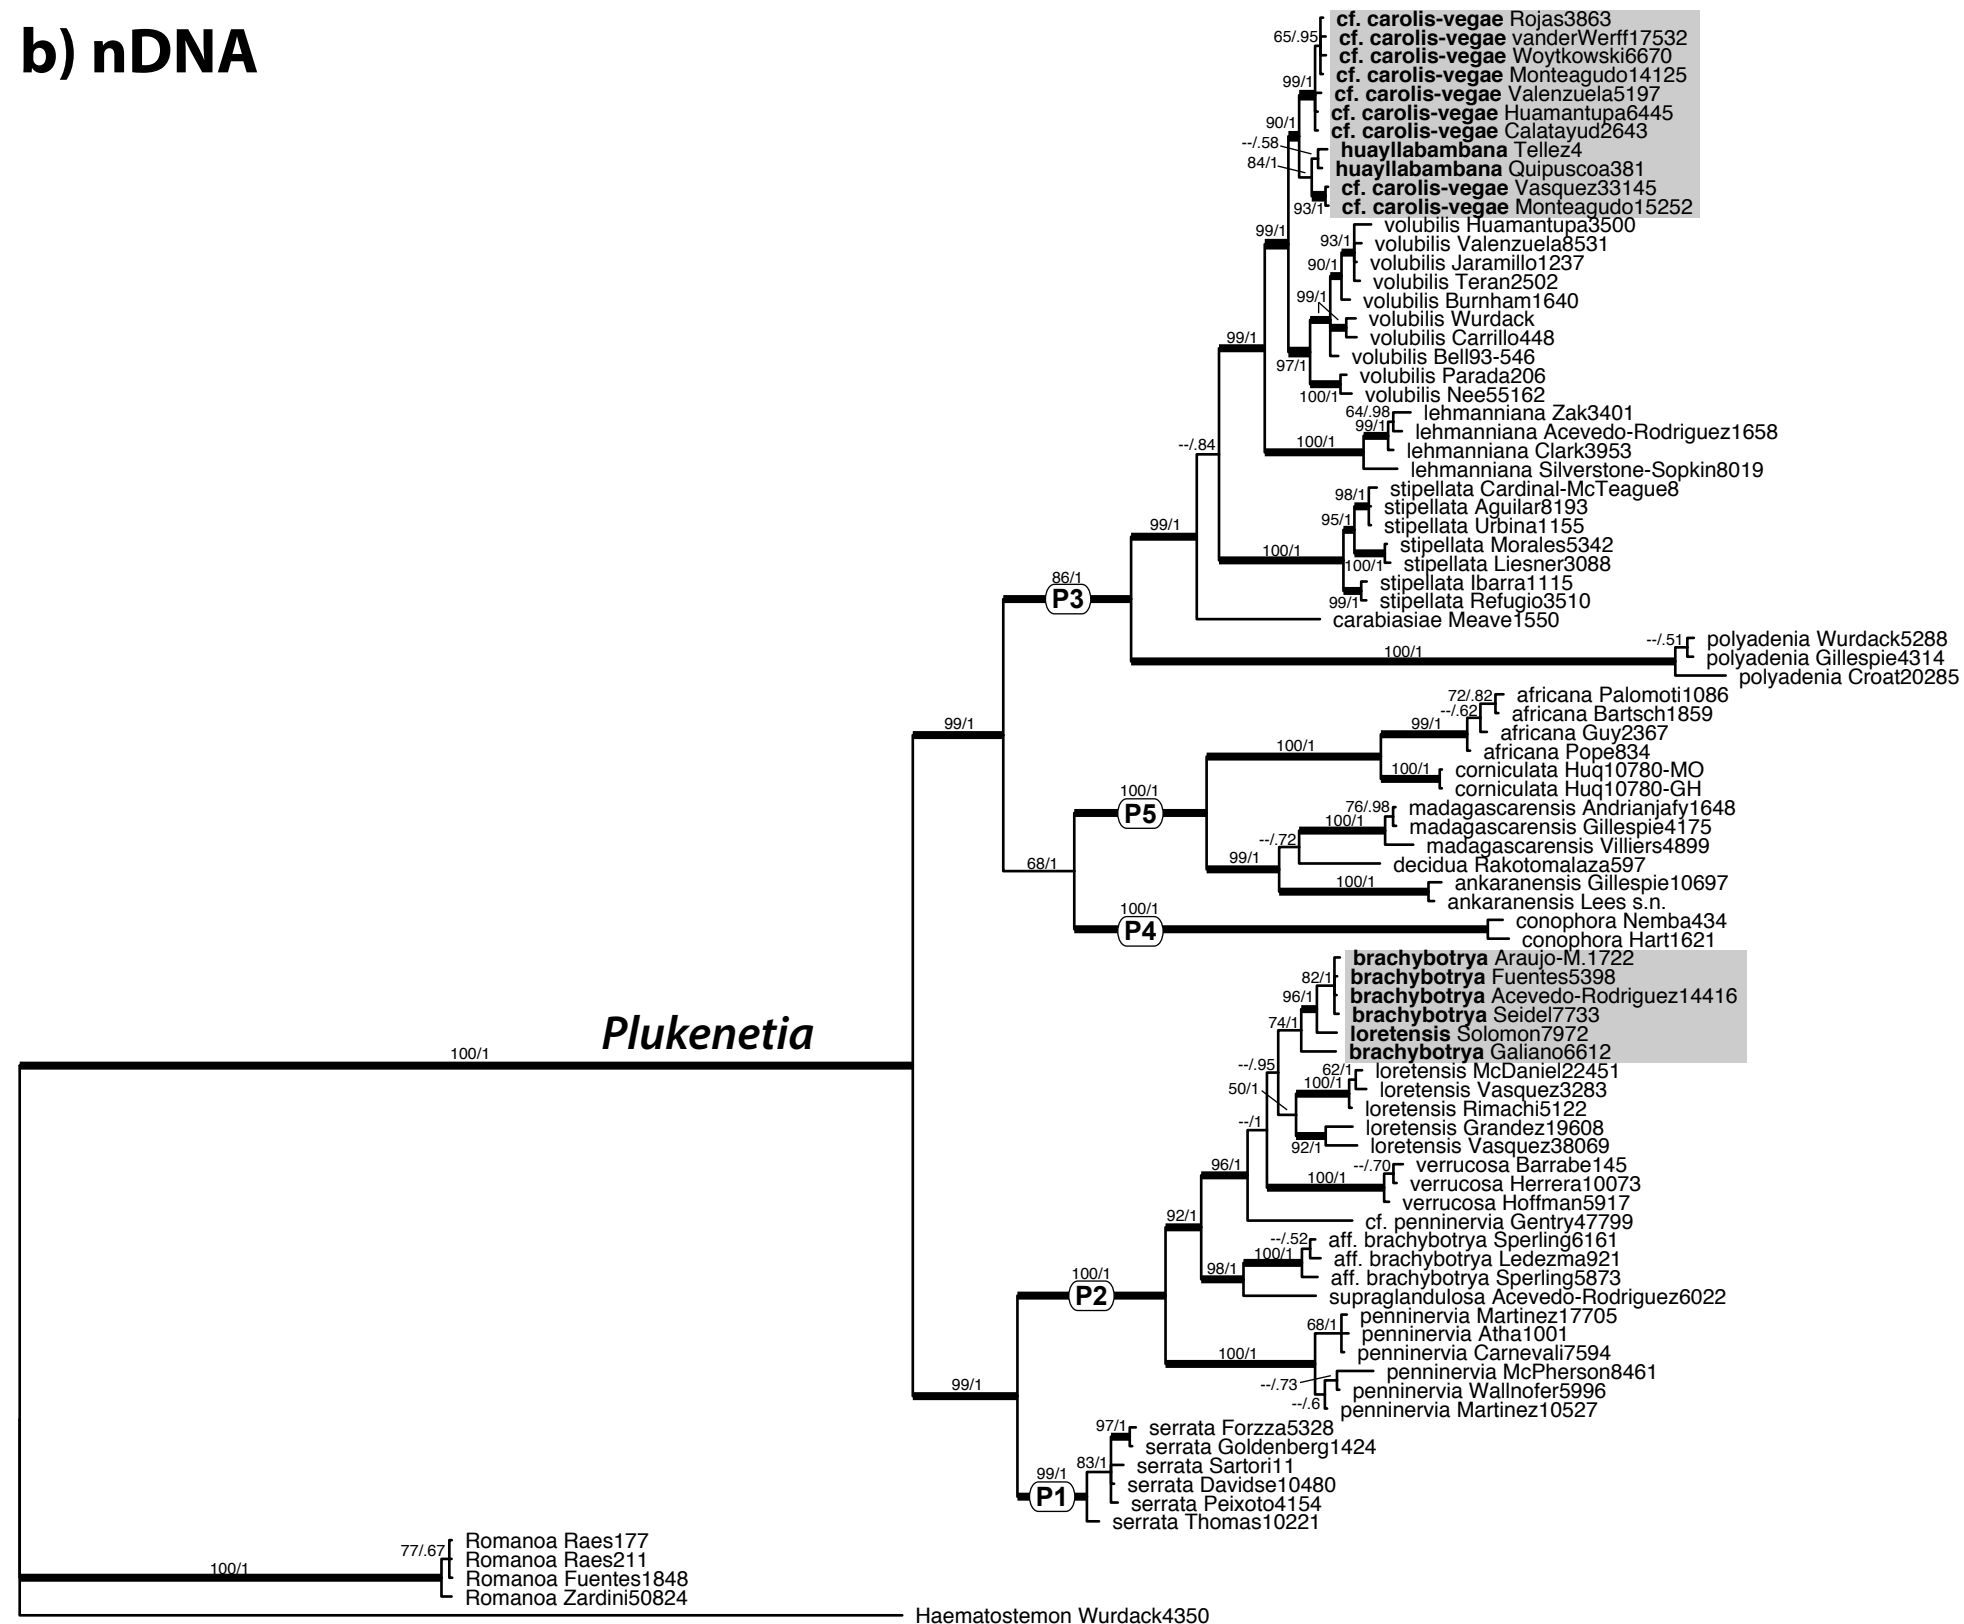

**Fig. S4** BEAST chronogram of *Plukenetia* and Plukenetiinae outgroups inferred from the combined seven marker (cpDNA and nDNA), 83 accession dataset and two normal-distribution priors (indicated in red) based on previous subfamily Acalyphoideae estimates using three fossil calibrations. Numbers at each node indicate mean age estimates, and blue bars the 95% highest posterior density confidence interval.

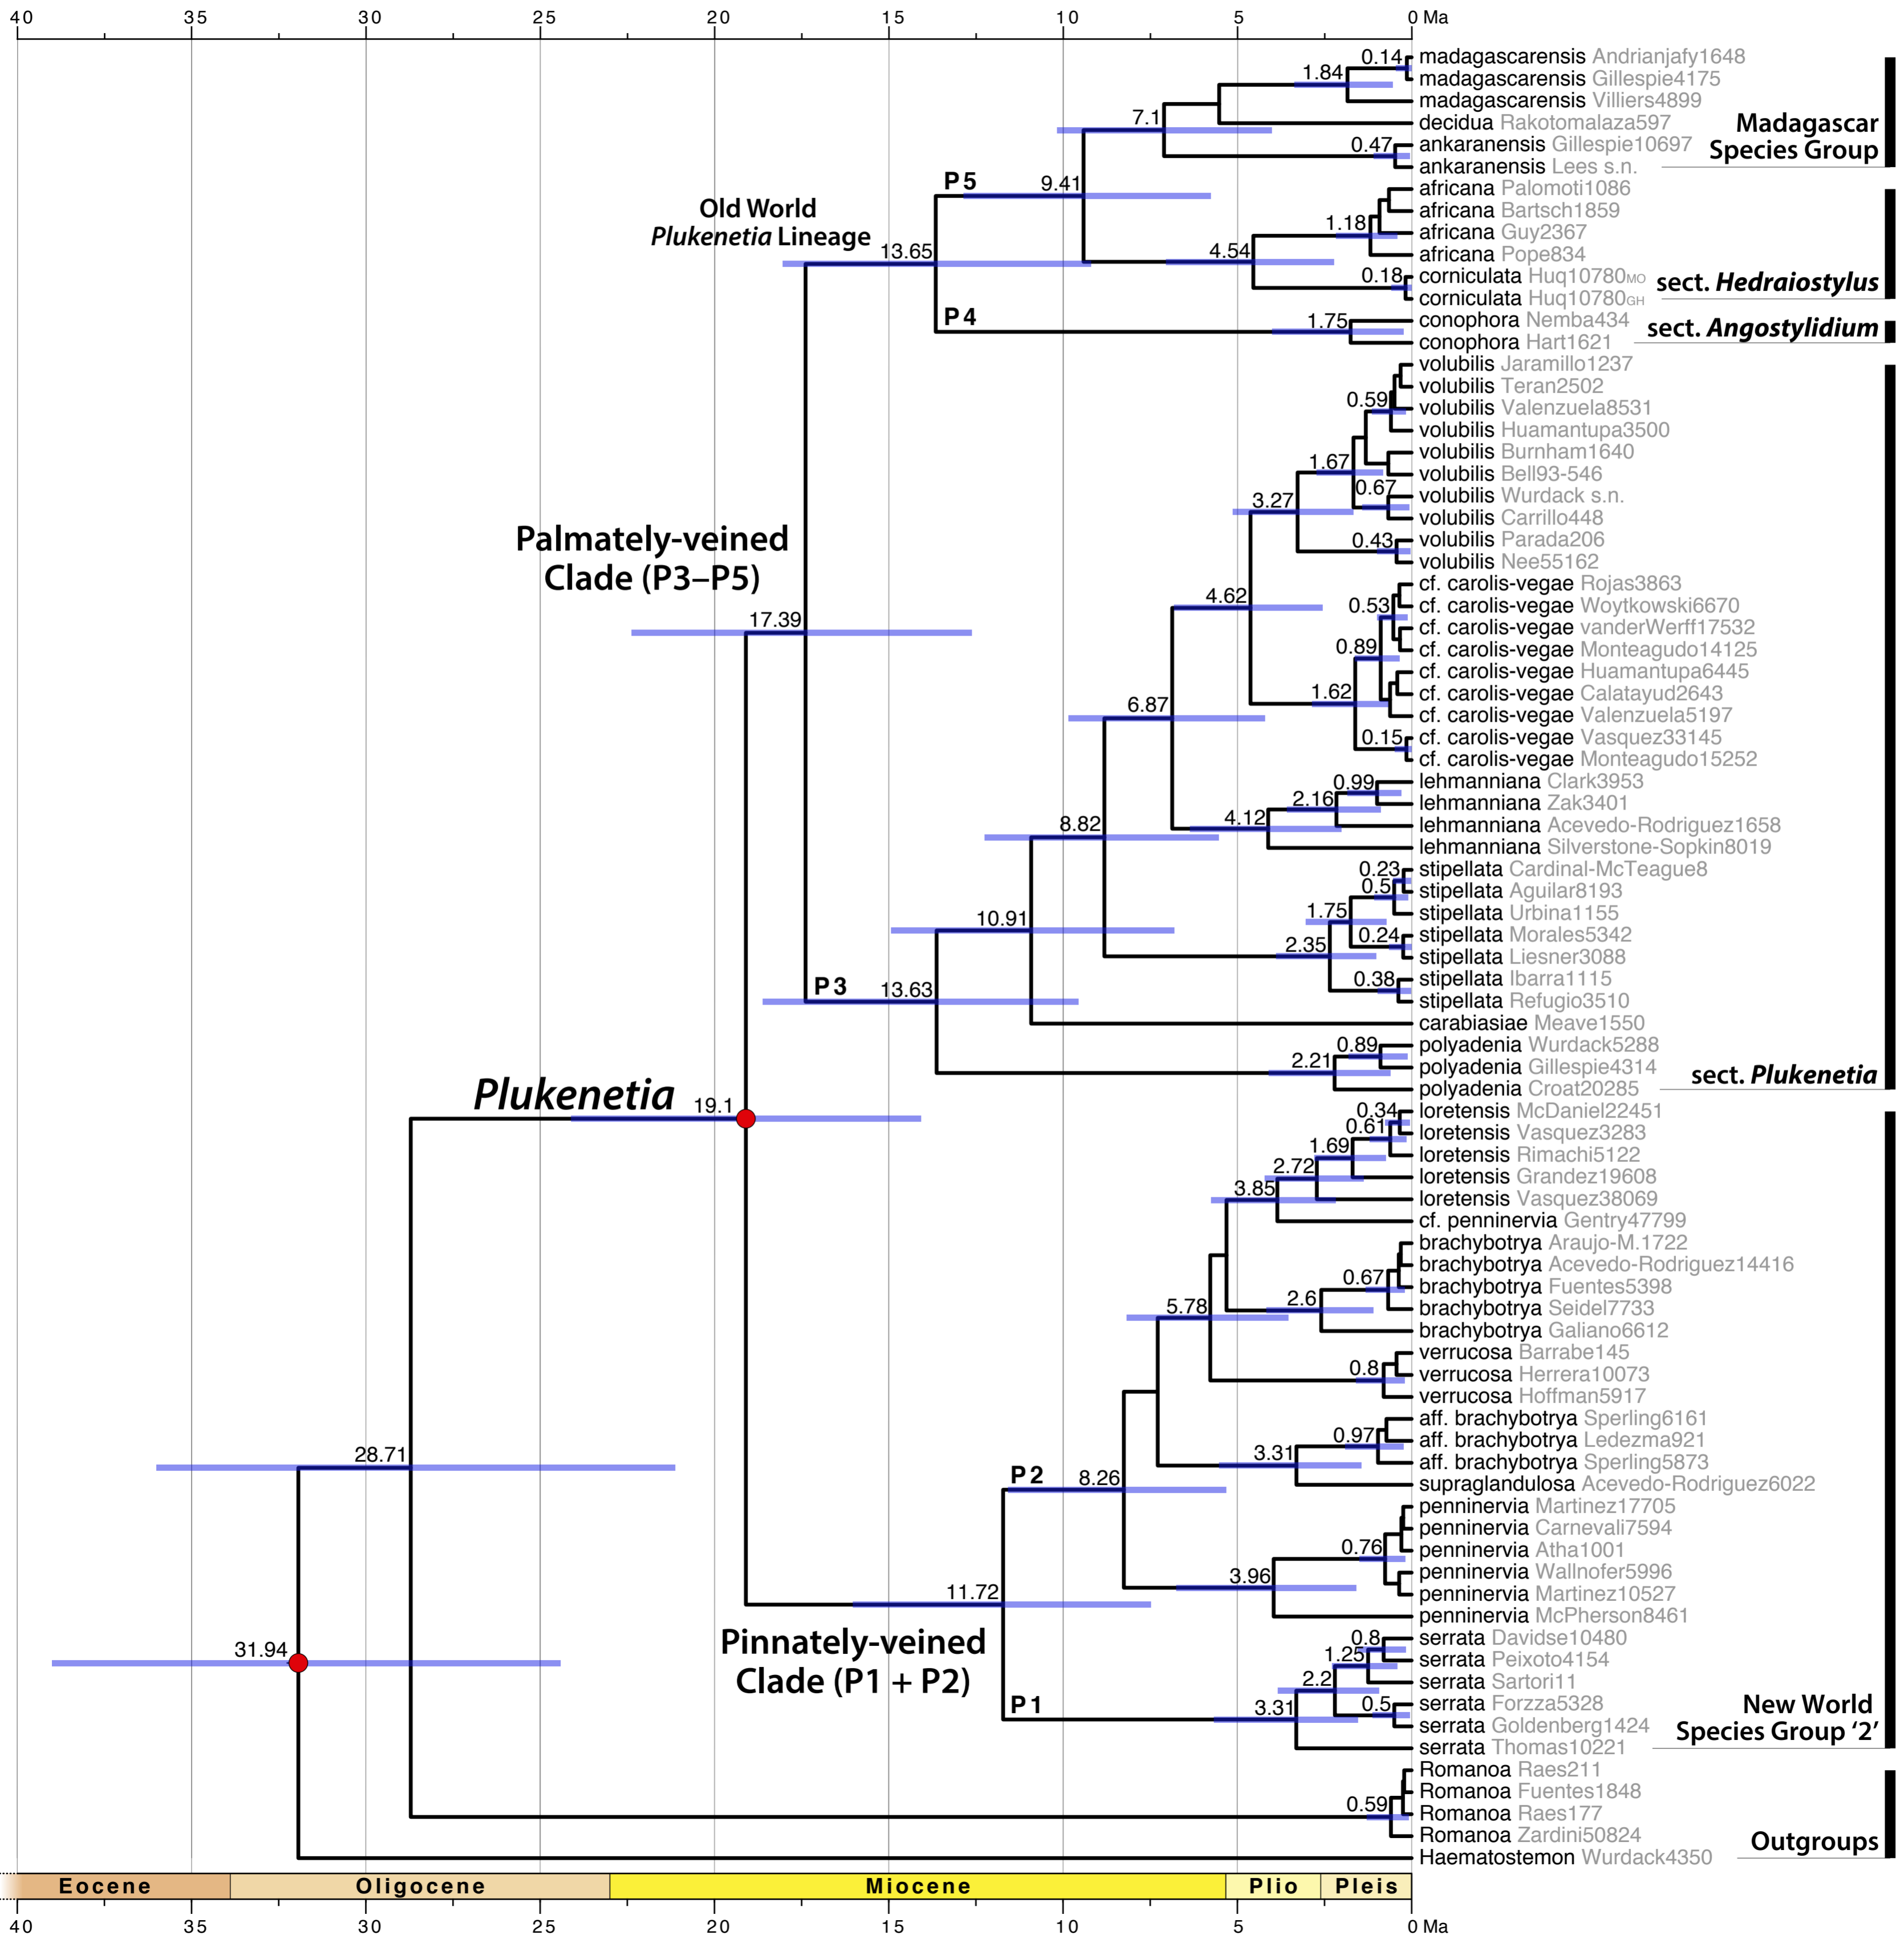

**Fig. S5 a BioGeoBEARS DEC+J on *Plukenetia***  
 ancstates: global optim, 2 areas max. d=0; e=0; j=0.3997; LnL=-27.26

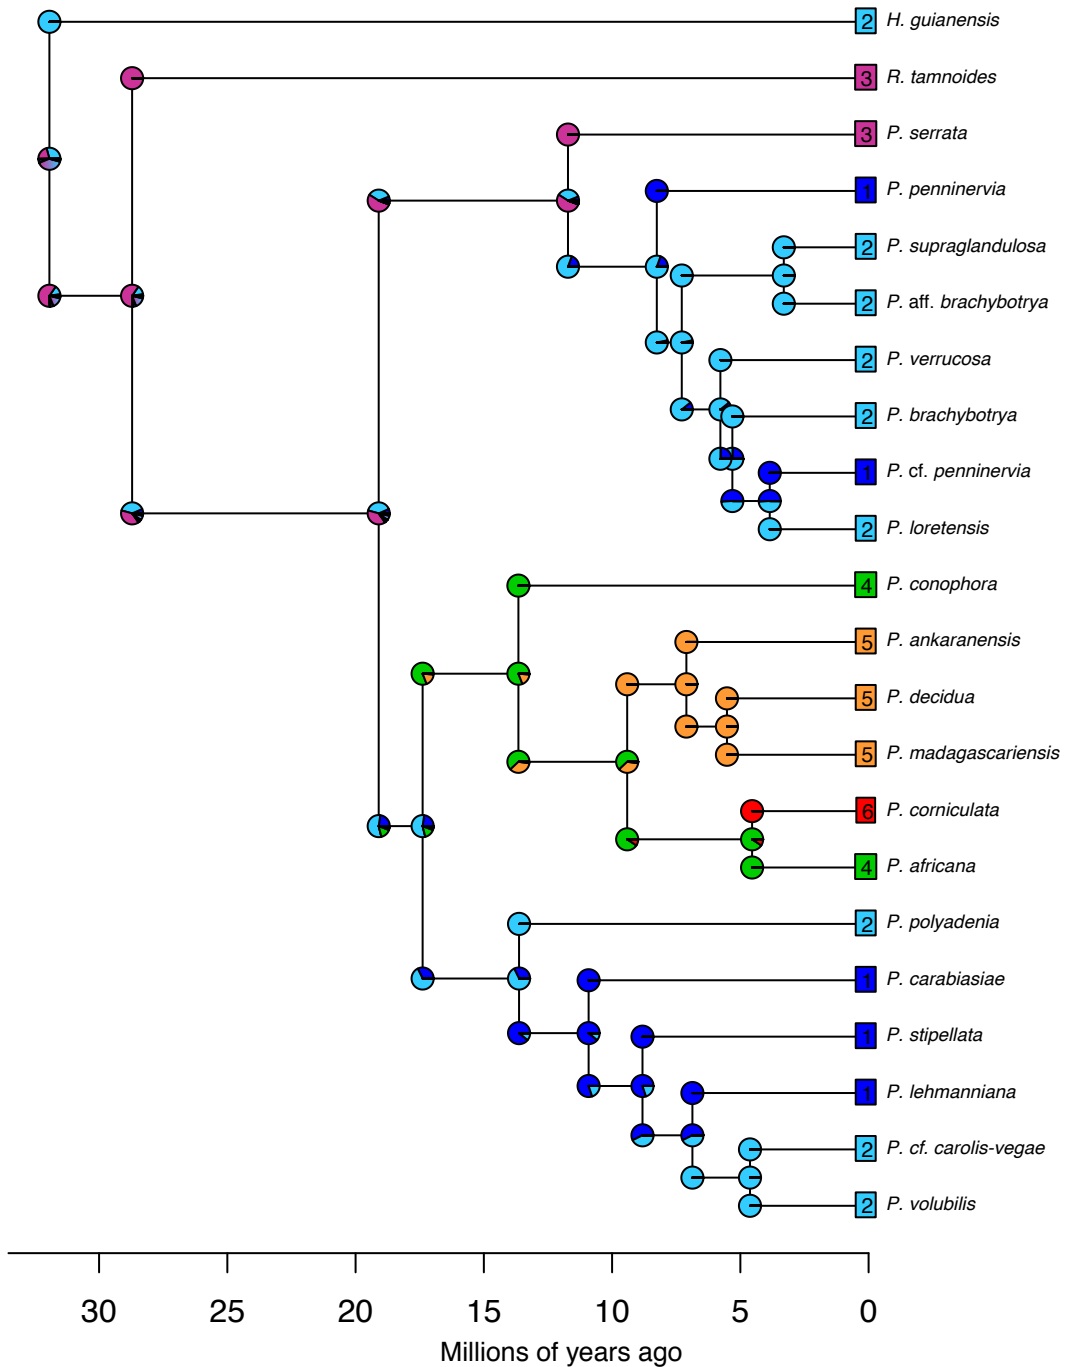

**Fig. S5 b BioGeoBEARS DEC on *Plukenetia***  
 ancstates: global optim, 2 areas max. d=0.034; e=0.0163; j=0; LnL=-46.67

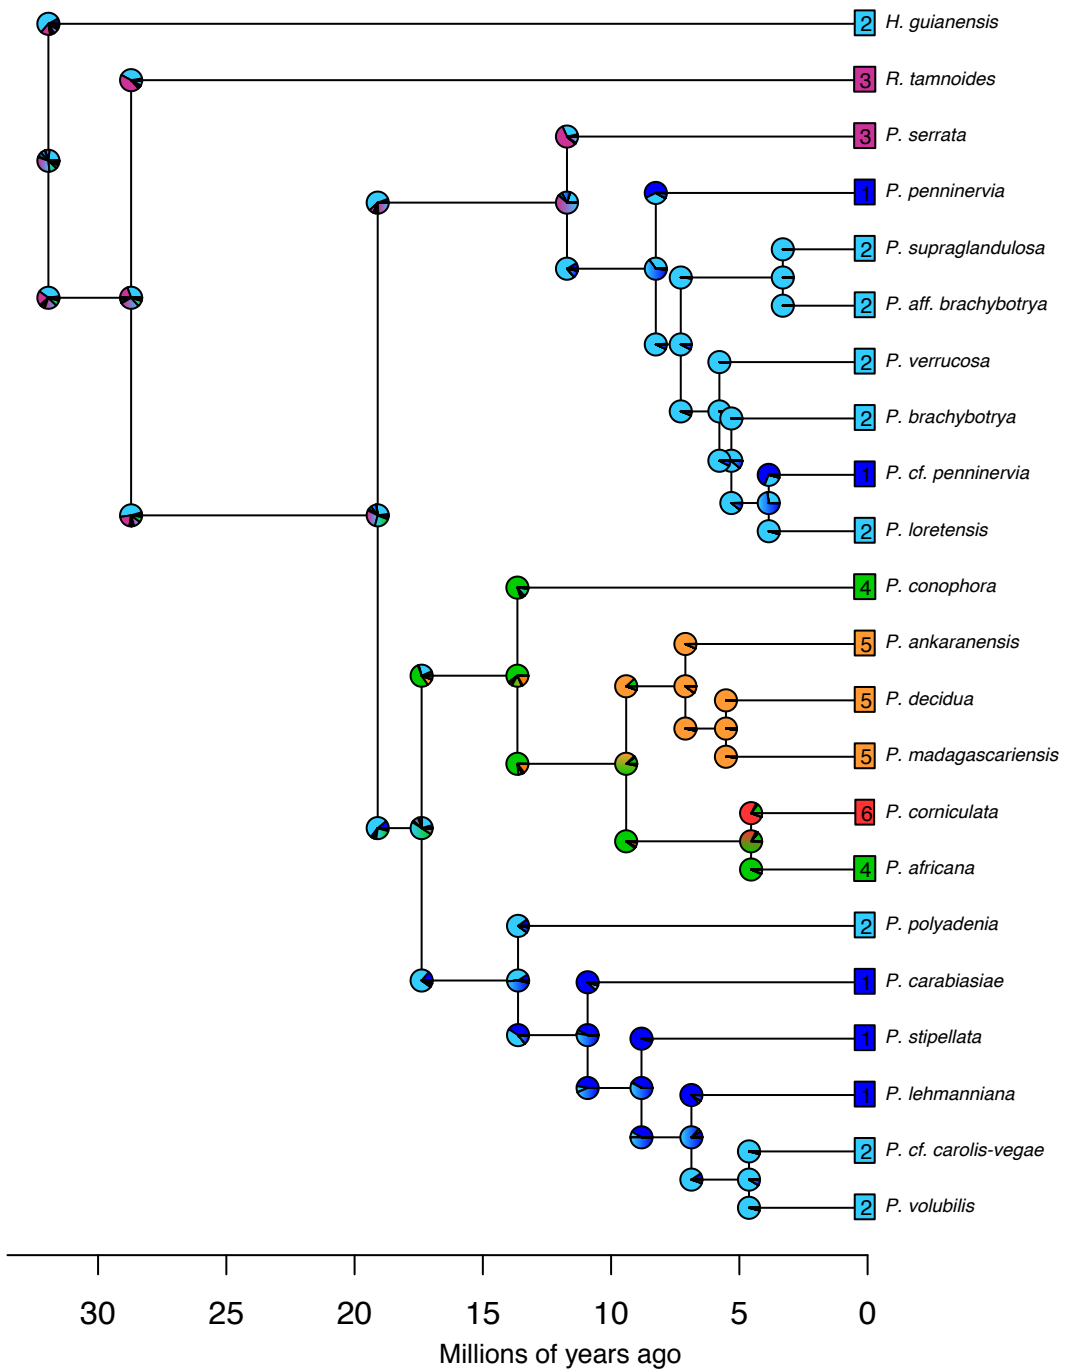

**Fig. S6** UPGMA clustering analysis of log10 transformed seed dimensions (length, width, thickness) for 190 accessions of *Plukenetia*.

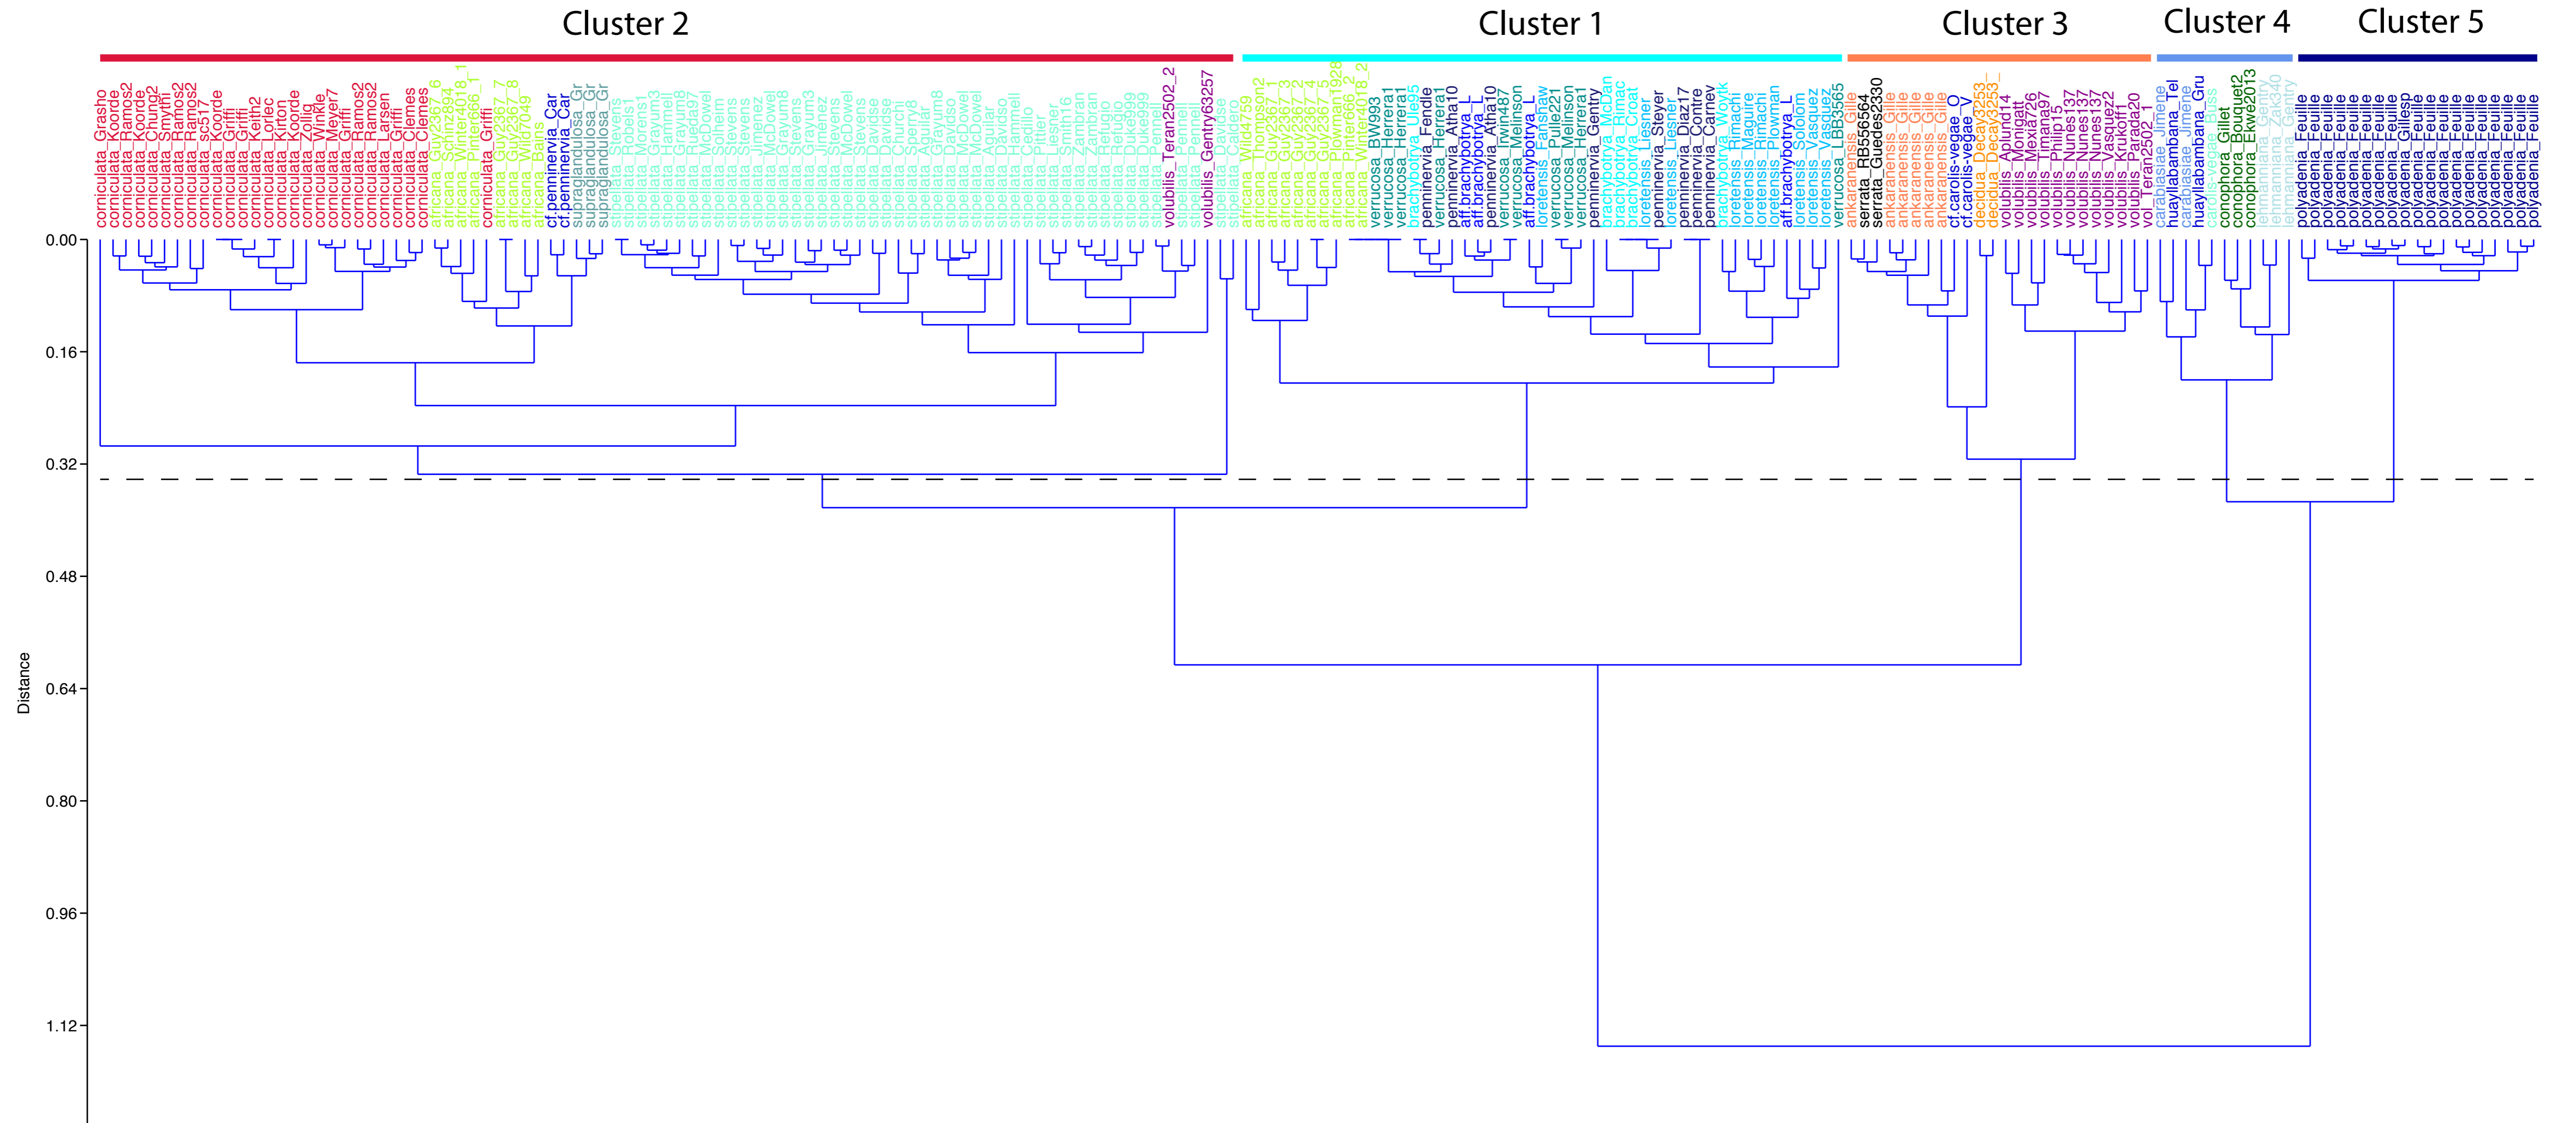

**Fig. S7** Principal components analysis of log10 transformed seed dimensions (length, width, thickness) for 190 accessions of *Plukenetia*.

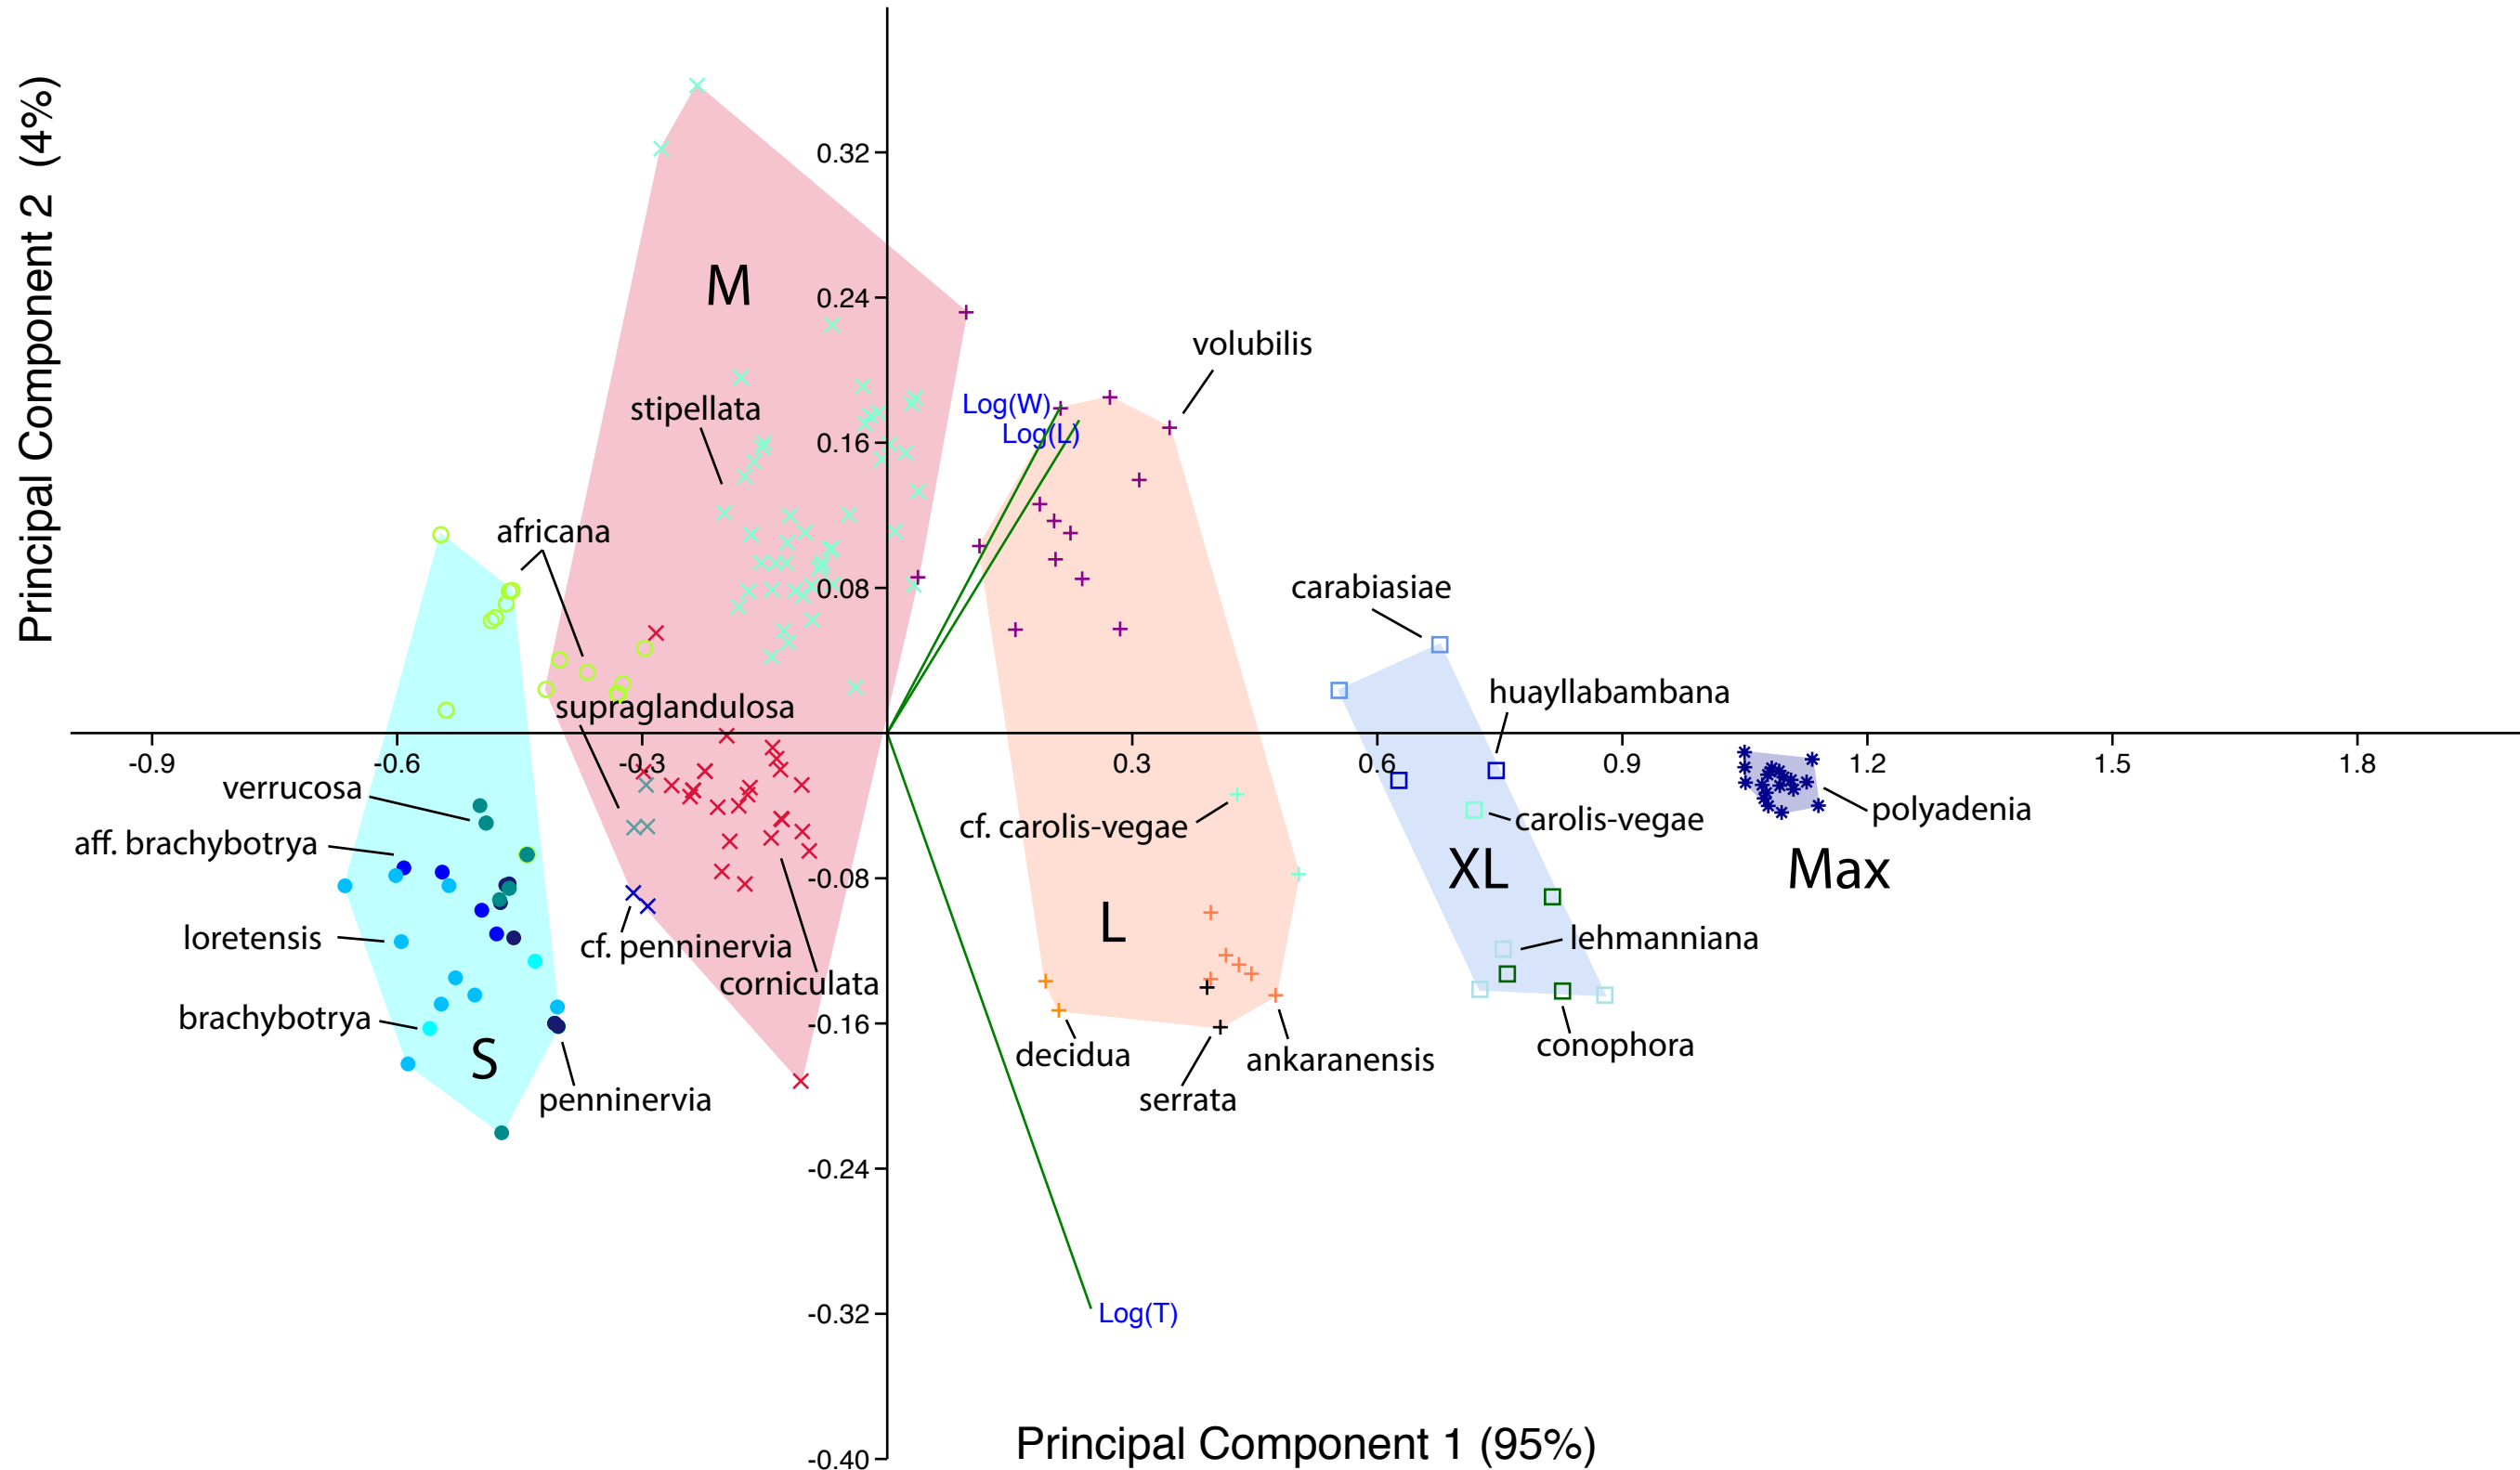

**Fig. S8** Posterior distributions of the correlation coefficients ( $r$ ) between the liabilities of seed size and (a) plant size, (b) fruit type, (c) seedling ecology, (d) fire tolerance, and (e) biome type, under the threshold model.

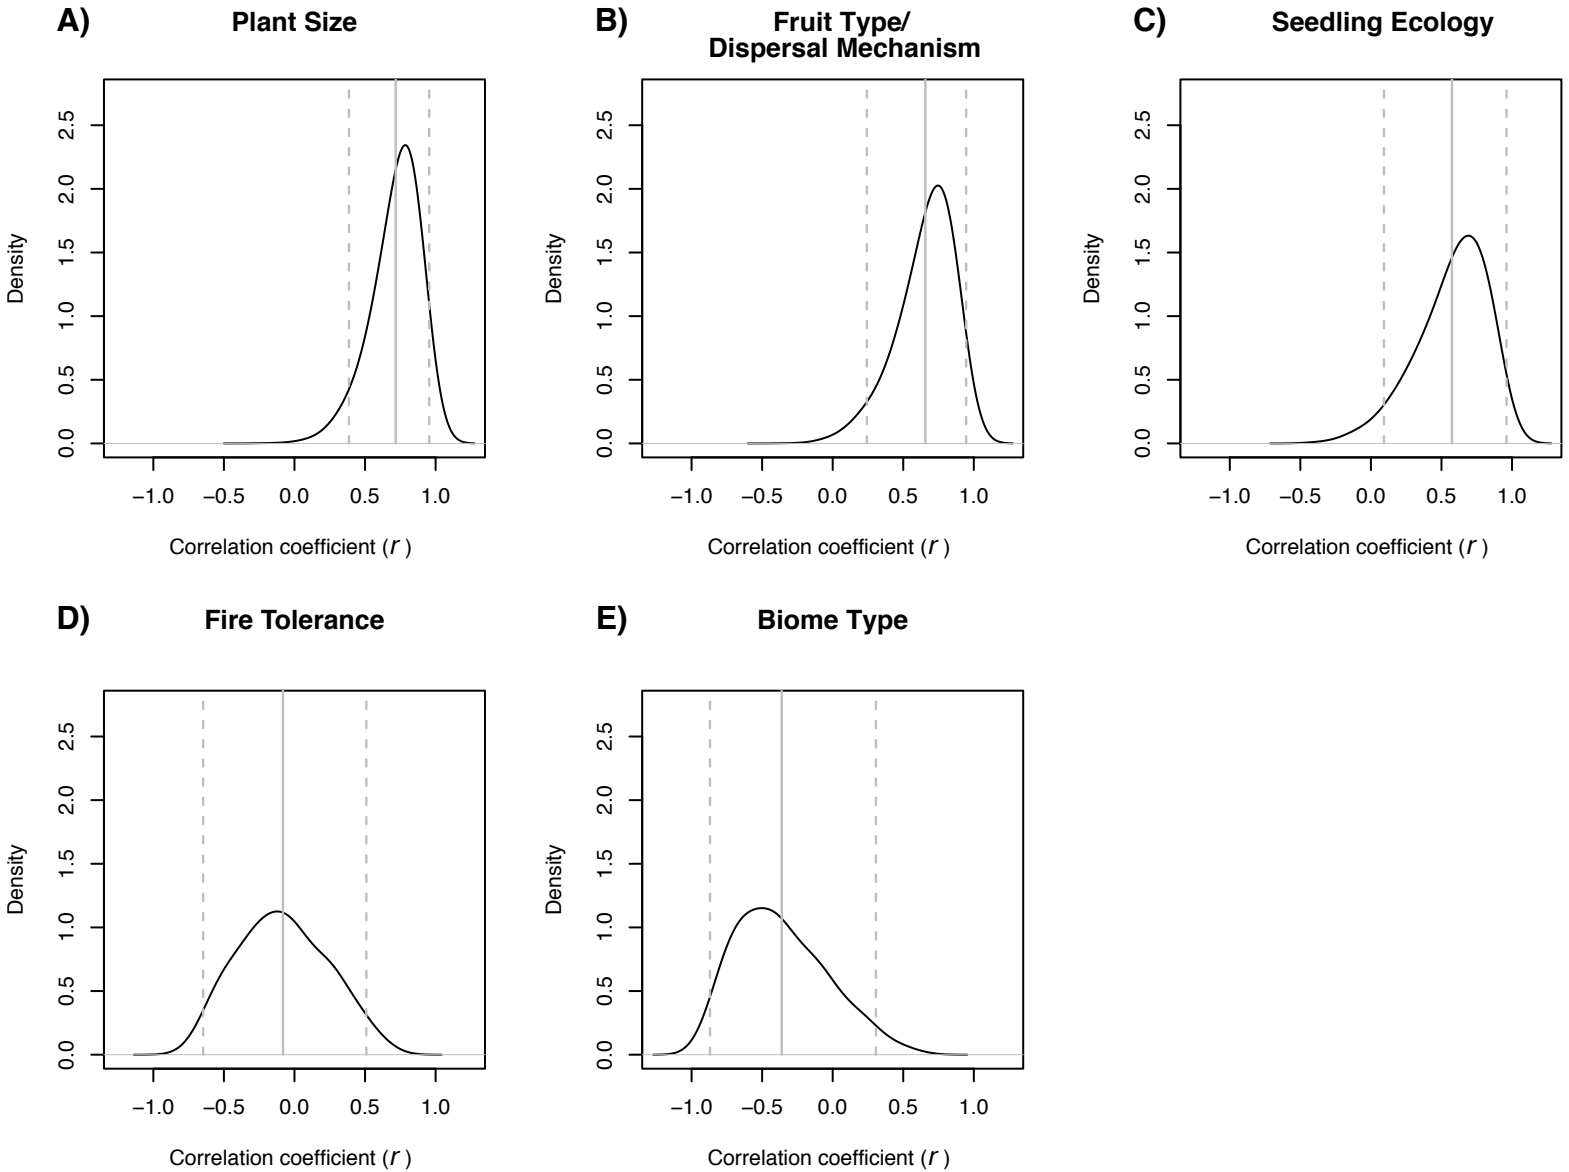

Supplement: 12862_2018_1308_MOESM4_ESM.pdf [file 12862_2018_1308_MOESM4_ESM.pdf]
