# Supplementary material for: Seed size evolution and biogeography of Plukenetia (Euphorbiaceae), a pantropical genus with traditionally cultivated oilseed species
Source: Springer Nature journal article supplement (doi:10.1186/s12862-018-1308-9), 2019-01-22
Supplement: 12862_2018_1308_MOESM1_ESM.pdf [file 12862_2018_1308_MOESM1_ESM.pdf]

**Table S1.** Accession table for vouchers used in phylogenetic analyses (bolded text indicates new GenBank accessions).

| No. | Species                                  | Voucher                                   | Country    | ITS             | ETS             | <i>KEA1</i><br>intron 11 | <i>KEA1</i><br>intron 17 | <i>TEB</i><br>exon 17 | <i>matK</i>     | <i>ndhF</i>     |
|-----|------------------------------------------|-------------------------------------------|------------|-----------------|-----------------|--------------------------|--------------------------|-----------------------|-----------------|-----------------|
| 1   | <i>Haematostemon guianensis</i> Sandwith | Wurdack 4350 (US) <sup>a</sup>            | Guyana     | KP794434        | <b>MF502427</b> | —                        | —                        | <b>MF502846</b>       | <b>MF502706</b> | <b>MF502776</b> |
| 2   | <i>Plukenetia africana</i> Sond.         | Bartsch 1859 (US)                         | Namibia    | <b>MF502513</b> | <b>MF502431</b> | <b>MF502579</b>          | <b>MF502651</b>          | <b>MF502848</b>       | <b>MF502710</b> | <b>MF502780</b> |
| 3   | <i>P. africana</i>                       | Guy 2367 (MO)                             | Botswana   | <b>MF502514</b> | —               | —                        | —                        | —                     | —               | <b>MF502781</b> |
| 4   | <i>P. africana</i>                       | Palomoti 1086 (MO)                        | Botswana   | <b>MF502515</b> | <b>MF502432</b> | —                        | —                        | —                     | <b>MF502711</b> | <b>MF502782</b> |
| 5   | <i>P. africana</i>                       | Pope et al. 834 (MO)                      | Botswana   | <b>MF502516</b> | <b>MF502433</b> | <b>MF502580</b>          | —                        | —                     | <b>MF502712</b> | <b>MF502783</b> |
| 6   | <i>P. ankaranensis</i> L.J.Gillespie     | Gillespie et al. 10697 (CAN) <sup>a</sup> | Madagascar | KP794438        | <b>MF502434</b> | <b>MF502581</b>          | <b>MF502652</b>          | <b>MF502849</b>       | <b>MF502713</b> | <b>MF502784</b> |
| 7   | <i>P. ankaranensis</i>                   | Lees s.n. (CAN)                           | Madagascar | KP794437        | <b>MF502435</b> | —                        | <b>MF502653</b>          | <b>MF502850</b>       | <b>MF502714</b> | <b>MF502785</b> |
| 8   | <i>P. brachybotrya</i> Müll.Arg.         | Acevedo-Rodriguez 14416 (NY)              | Peru       | <b>MF502517</b> | <b>MF502436</b> | <b>MF502582</b>          | <b>MF502654</b>          | <b>MF502851</b>       | <b>MF502715</b> | <b>MF502786</b> |
| 9   | <i>P. brachybotrya</i>                   | Araujo-M. et al. 1722 (MO)                | Bolivia    | KP794452        | <b>MF502437</b> | <b>MF502583</b>          | <b>MF502655</b>          | <b>MF502852</b>       | <b>MF502716</b> | <b>MF502787</b> |
| 10  | <i>P. brachybotrya</i>                   | Fuentes & Torrico 5398 (MO)               | Bolivia    | <b>MF502518</b> | <b>MF502438</b> | <b>MF502584</b>          | —                        | —                     | <b>MF502717</b> | <b>MF502788</b> |
| 11  | <i>P. brachybotrya</i>                   | Galiano et al. 6612 (MO)                  | Peru       | <b>MF502519</b> | <b>MF502439</b> | —                        | —                        | —                     | <b>MF502718</b> | <b>MF502789</b> |
| 12  | <i>P. brachybotrya</i>                   | Seidel & Vaquiata 7733 (MO)               | Bolivia    | <b>MF502520</b> | <b>MF502440</b> | <b>MF502585</b>          | <b>MF502656</b>          | <b>MF502853</b>       | <b>MF502719</b> | <b>MF502790</b> |
| 13  | <i>P. aff. brachybotrya</i>              | Ledezma et al. 921 (CAN)                  | Bolivia    | <b>MF502511</b> | <b>MF502428</b> | <b>MF502576</b>          | <b>MF502649</b>          | —                     | <b>MF502707</b> | <b>MF502777</b> |
| 14  | <i>P. aff. brachybotrya</i>              | Sperling et al. 5873 (MO)                 | Brazil     | <b>MF502512</b> | <b>MF502429</b> | <b>MF502577</b>          | <b>MF502650</b>          | <b>MF502847</b>       | <b>MF502708</b> | <b>MF502778</b> |
| 15  | <i>P. aff. brachybotrya</i>              | Sperling et al. 6161 (CAN)                | Brazil     | —               | <b>MF502430</b> | <b>MF502578</b>          | —                        | —                     | <b>MF502709</b> | <b>MF502779</b> |
| 16  | <i>P. carabiasiae</i> J.Jiménez Ram.     | Meave et al. 1550 (MO)                    | Mexico     | <b>MF502521</b> | <b>MF502441</b> | <b>MF502586</b>          | —                        | —                     | <b>MF502720</b> | —               |
| 17  | <i>P. cf. carolis-vegae</i>              | Calatayud et al. 2643 (CAN)               | Peru       | <b>MF502527</b> | <b>MF502448</b> | <b>MF502592</b>          | —                        | —                     | —               | —               |
| 18  | <i>P. cf. carolis-vegae</i>              | Huamantupa et al. 6445 (CAN)              | Peru       | <b>MF502528</b> | <b>MF502449</b> | <b>MF502593</b>          | <b>MF502660</b>          | —                     | <b>MF502724</b> | —               |
| 19  | <i>P. cf. carolis-vegae</i>              | Monteagudo et al. 14125 (MO)              | Peru       | <b>MF502529</b> | <b>MF502450</b> | <b>MF502594</b>          | <b>MF502661</b>          | —                     | <b>MF502725</b> | <b>MF502793</b> |
| 20  | <i>P. cf. carolis-vegae</i>              | Monteagudo et al. 15252 (MO)              | Peru       | <b>MF502530</b> | <b>MF502451</b> | —                        | —                        | —                     | <b>MF502726</b> | <b>MF502794</b> |
| 21  | <i>P. cf. carolis-vegae</i>              | Rojas et al. 3863 (CAN)                   | Peru       | <b>MF502532</b> | <b>MF502453</b> | <b>MF502595</b>          | —                        | —                     | —               | —               |

|    |                                                             |                                               |                                  |          |          |          |          |          |          |          |
|----|-------------------------------------------------------------|-----------------------------------------------|----------------------------------|----------|----------|----------|----------|----------|----------|----------|
| 22 | <i>P. cf. carolis-vegae</i>                                 | Valenzuela et al. 5197 (CAN)                  | Peru                             | MF502534 | MF502455 | MF502597 | MF502663 | —        | —        | —        |
| 23 | <i>P. cf. carolis-vegae</i>                                 | van der Werff et al. 17532 (CAN)              | Peru                             | MF502535 | MF502456 | MF502598 | MF502664 | MF502856 | MF502729 | MF502797 |
| 24 | <i>P. cf. carolis-vegae</i>                                 | Vasquez et al. 33145 (MO)                     | Peru                             | MF502536 | MF502457 | MF502599 | MF502665 | MF502857 | MF502730 | MF502798 |
| 25 | <i>P. cf. carolis-vegae</i>                                 | Woytkowski 6670 (MO)                          | Peru                             | MF502537 | MF502458 | MF502600 | MF502666 | MF502858 | MF502731 | MF502799 |
| 26 | <i>P. conophora</i><br>Müll.Arg.                            | Hart 1621 (MO)                                | Democratic Republic of the Congo | MF502523 | MF502443 | MF502588 | —        | —        | —        | —        |
| 27 | <i>P. conophora</i>                                         | Nemba & Thomas 434 (MO)                       | Cameroon                         | KP794457 | MF502444 | MF502589 | MF502657 | —        | MF502722 | MF502792 |
| 28 | <i>P. corniculata</i> Sm.                                   | Huq & Haroon 10780 (GH)                       | Bangladesh                       | MF502524 | MF502445 | MF502590 | MF502658 | MF502854 | —        | —        |
| 29 | <i>P. corniculata</i>                                       | Huq & Haroon 10780 (MO)                       | Bangladesh                       | MF502525 | MF502446 | MF502591 | MF502659 | MF502855 | MF502723 | —        |
| 30 | <i>P. decidua</i><br>L.J.Gillespie                          | Rakotomalaza 597 (CAN)                        | Madagascar                       | MF502526 | MF502447 | —        | —        | —        | —        | —        |
| 31 | <i>P. huayllabambana</i><br>Bussmann, C.Tellez & A.Glenn    | Quipusco 381 (MO)                             | Peru                             | MF502531 | MF502452 | —        | —        | —        | MF502727 | MF502795 |
| 32 | <i>P. huayllabambana</i>                                    | Tellez et al. 4 (MO)                          | Peru                             | MF502533 | MF502454 | MF502596 | MF502662 | —        | MF502728 | MF502796 |
| 33 | <i>P. lehmanniana</i> (Pax & K.Hoffm.) Huft & L.J.Gillespie | Acevedo-Rodriguez & Daly 1658 (MO)            | Ecuador                          | KP494443 | MF502459 | MF502601 | MF502667 | MF502859 | MF502732 | MF502800 |
| 34 | <i>P. lehmanniana</i>                                       | Clark 3953 (MO)                               | Ecuador                          | MF502538 | MF502460 | MF502602 | MF502668 | MF502860 | MF502733 | MF502801 |
| 35 | <i>P. lehmanniana</i>                                       | Silverstone-Sopkin & Giralda-Gesini 8019 (MO) | Colombia                         | MF502539 | MF502461 | MF502603 | —        | MF502861 | MF502734 | MF502802 |
| 36 | <i>P. lehmanniana</i>                                       | Zak & Jaramillo 3401 (MO)                     | Ecuador                          | MF502540 | MF502462 | MF502604 | MF502669 | MF502862 | MF502735 | MF502803 |
| 37 | <i>P. lorentensis</i> Ule                                   | Grandez 19608 (AMAZ) <sup>a</sup>             | Peru                             | KP794453 | MF502463 | MF502605 | MF502670 | MF502863 | MF502736 | MF502804 |
| 38 | <i>P. lorentensis</i>                                       | McDaniel & Rimachi 22451 (MO)                 | Peru                             | MF502541 | MF502464 | MF502606 | —        | —        | MF502737 | MF502805 |
| 39 | <i>P. lorentensis</i>                                       | Rimachi 5122 (MO)                             | Peru                             | MF502542 | MF502465 | MF502607 | —        | —        | MF502738 | MF502806 |
| 40 | <i>P. lorentensis</i>                                       | Solomon 7972 (MO)                             | Bolivia                          | MF502543 | MF502466 | MF502608 | —        | MF502864 | MF502739 | MF502807 |
| 41 | <i>P. lorentensis</i>                                       | Vásquez & Jaramillo 3283 (MO)                 | Peru                             | MF502544 | MF502467 | MF502609 | —        | —        | —        | —        |
| 42 | <i>P. lorentensis</i>                                       | Vasquez et al. 38069 (MO)                     | Peru                             | MF502545 | MF502468 | MF502610 | MF502671 | MF502865 | MF502740 | MF502808 |
| 43 | <i>P. madagascarensis</i><br>Leandri                        | Andrianjafy 1648 (CAN)                        | Madagascar                       | MF502546 | MF502469 | MF502611 | MF502672 | —        | MF502741 | —        |

|    |                                            |                                        |                                                  |          |          |          |          |          |          |          |
|----|--------------------------------------------|----------------------------------------|--------------------------------------------------|----------|----------|----------|----------|----------|----------|----------|
| 44 | <i>P. madagascarensis</i>                  | Gillespie 4175 (CAN)                   | Madagascar                                       | MF502547 | MF502470 | MF502612 | MF502673 | MF502866 | MF502742 | MF502809 |
| 45 | <i>P. madagascarensis</i>                  | Villiers et al. 4899 (MO)              | Madagascar                                       | MF502548 | MF502471 | MF502613 | MF502674 | MF502867 | MF502743 | MF502810 |
| 46 | <i>P. penninervia</i><br>Müll.Arg.         | Atha et al. 1001 (MO)                  | Belize                                           | KP794455 | MF502472 | MF502614 | MF502675 | MF502868 | MF502744 | MF502811 |
| 47 | <i>P. penninervia</i>                      | Carnevali & Duno 7594 (MO)             | Mexico                                           | MF502549 | MF502473 | MF502615 | MF502676 | MF502869 | MF502745 | MF502812 |
| 48 | <i>P. penninervia</i>                      | Martínez 10527 (MO)                    | Mexico                                           | KP794456 | MF502474 | MF502616 | MF502677 | MF502870 | MF502746 | MF502813 |
| 49 | <i>P. penninervia</i>                      | Martinez 17705 (DAV)                   | Mexico                                           | MF502550 | MF502475 | MF502617 | MF502678 | MF502871 | MF502747 | MF502814 |
| 50 | <i>P. penninervia</i>                      | McPherson 8461 (MO)                    | Panama                                           | KP794454 | MF502476 | MF502618 | MF502679 | MF502872 | MF502748 | MF502815 |
| 51 | <i>P. penninervia</i>                      | Wallnöfer & Frisch 5996 (MO)           | Guatemala                                        | MF502551 | MF502477 | MF502619 | —        | MF502873 | MF502749 | MF502816 |
| 52 | <i>P. cf. penninervia</i>                  | Gentry 47799 (MO)                      | Colombia                                         | MF502522 | MF502442 | MF502587 | —        | —        | MF502721 | MF502791 |
| 53 | <i>P. polyadenia</i><br>Müll.Arg.          | Croat 20285 (MO)                       | Peru                                             | MF502552 | —        | —        | —        | —        | MF502750 | MF502817 |
| 54 | <i>P. polyadenia</i>                       | Gillespie 4314 (CAN)                   | Smithsonian<br>Greenhouse<br>ex French<br>Guiana | MF502553 | MF502478 | MF502620 | MF502680 | MF502874 | MF502751 | MF502818 |
| 55 | <i>P. polyadenia</i>                       | Wurdack 5288 (US)                      | Guyana                                           | MF502554 | MF502479 | MF502621 | MF502681 | MF502875 | MF502752 | MF502819 |
| 56 | <i>P. serrata</i> (Vell.)<br>L.J.Gillespie | Davidse 10480 (MO)                     | Brazil                                           | MF502555 | MF502480 | —        | —        | —        | MF502753 | MF502820 |
| 57 | <i>P. serrata</i>                          | Forzza et al. 5328 (RB)                | Brazil                                           | MF502556 | MF502481 | MF502622 | MF502682 | —        | MF502754 | MF502821 |
| 58 | <i>P. serrata</i>                          | Goldenberg et al. 1424 (RB)            | Brazil                                           | MF502557 | MF502482 | MF502623 | MF502683 | —        | MF502755 | MF502822 |
| 59 | <i>P. serrata</i>                          | Peixoto et al. 4154 (MO)               | Brazil                                           | KP794458 | MF502483 | MF502624 | —        | —        | MF502756 | MF502823 |
| 60 | <i>P. serrata</i>                          | Sartori & Pardo 11 (RB)                | Brazil                                           | MF502558 | MF502484 | MF502625 | MF502684 | —        | MF502757 | MF502824 |
| 61 | <i>P. serrata</i>                          | Thomas 10221 (NY)                      | Brazil                                           | MF502559 | MF502485 | MF502626 | MF502685 | —        | —        | MF502825 |
| 62 | <i>P. stipellata</i><br>L.J.Gillespie      | Aguilar 8193 (MO)                      | Costa Rica                                       | KP794448 | MF502486 | MF502627 | MF502686 | MF502876 | MF502758 | MF502826 |
| 63 | <i>P. stipellata</i>                       | Cardinal-McTeague 8 (CAN) <sup>a</sup> | Costa Rica                                       | MF502560 | MF502487 | MF502628 | MF502687 | MF502877 | MF502759 | MF502827 |
| 64 | <i>P. stipellata</i>                       | Ibarra Manriquez & Sinaca 1115 (MO)    | Mexico                                           | MF502561 | MF502488 | MF502629 | MF502688 | MF502878 | —        | MF502828 |
| 65 | <i>P. stipellata</i>                       | Liesner 3088 (MO)                      | Costa Rica                                       | KP794451 | MF502489 | MF502630 | MF502689 | MF502879 | —        | MF502829 |
| 66 | <i>P. stipellata</i>                       | Morales & Rojas 5342 (MO)              | Costa Rica                                       | KP794450 | MF502490 | MF502631 | MF502690 | MF502880 | MF502760 | MF502830 |

|    |                                                  |                                  |                                |          |          |          |          |          |          |          |
|----|--------------------------------------------------|----------------------------------|--------------------------------|----------|----------|----------|----------|----------|----------|----------|
| 67 | <i>P. stipellata</i>                             | Refugio Cedillo Trigas 3510 (MO) | Mexico                         | MF502562 | MF502491 | MF502632 | MF502691 | MF502881 | MF502761 | MF502831 |
| 68 | <i>P. stipellata</i>                             | Urbina 1155 (MO)                 | Nicaragua                      | KP794449 | MF502492 | MF502633 | MF502692 | MF502882 | MF502762 | MF502832 |
| 69 | <i>P. supraglandulosa</i><br>L.J.Gillespie       | Acevedo-Rodriguez 6022 (US)      | Suriname                       | MF502563 | MF502493 | MF502634 | MF502693 | MF502883 | MF502763 | MF502833 |
| 70 | <i>P. verrucosa</i> Sm.                          | Barrabe & Crozier 145 (US)       | French Guiana                  | MF502564 | MF502494 | MF502635 | MF502694 | MF502884 | MF502764 | MF502834 |
| 71 | <i>P. verrucosa</i>                              | Herrera & Kaemar 10073 (CAN)     | Suriname                       | MF502565 | MF502495 | —        | —        | —        | —        | —        |
| 72 | <i>P. verrucosa</i>                              | Hoffman 5917 (US)                | Suriname                       | MF502566 | MF502496 | MF502636 | MF502695 | MF502885 | MF502765 | MF502835 |
| 73 | <i>P. volubilis</i> L.                           | Bell 93-546 (US)                 | Peru                           | KP794447 | MF502497 | MF502637 | MF502696 | MF502886 | MF502766 | MF502836 |
| 74 | <i>P. volubilis</i>                              | Burnham & Krings 1640 (MO)       | Ecuador                        | KP794446 | MF502498 | MF502638 | MF502697 | MF502887 | MF502767 | MF502837 |
| 75 | <i>P. volubilis</i>                              | Carrillo & Reyes 448 (MO)        | Ecuador                        | MF502567 | MF502499 | MF502639 | —        | —        | —        | —        |
| 76 | <i>P. volubilis</i>                              | Huamantupa 3500 (CAN)            | Peru                           | MF502568 | MF502500 | MF502640 | MF502698 | —        | —        | —        |
| 77 | <i>P. volubilis</i>                              | Jaramillo et al. 1237 (MO)       | Bolivia                        | MF502569 | MF502501 | MF502641 | MF502699 | —        | MF502768 | MF502838 |
| 78 | <i>P. volubilis</i>                              | Nee 55162 (MO)                   | Bolivia                        | KP794445 | MF502502 | MF502642 | MF502700 | MF502888 | MF502769 | MF502839 |
| 79 | <i>P. volubilis</i>                              | Parada et al. 206 (CAN)          | Bolivia                        | KP794444 | MF502503 | MF502643 | MF502701 | MF502889 | MF502770 | MF502840 |
| 80 | <i>P. volubilis</i>                              | Teran et al. 2502 (MO)           | Bolivia                        | MF502570 | MF502504 | MF502644 | MF502702 | —        | MF502771 | MF502841 |
| 81 | <i>P. volubilis</i>                              | Valenzuela 8531 (MO)             | Peru                           | MF502571 | MF502505 | —        | —        | —        | —        | —        |
| 82 | <i>P. volubilis</i>                              | Wurdack s.n. (US) <sup>a</sup>   | Smithsonian Greenhouse ex Peru | MF502572 | MF502506 | MF502645 | MF502703 | MF502890 | MF502772 | MF502842 |
| 83 | <i>Romanoa tamnoides</i><br>(A.Juss.) Radcl.-Sm. | Fuentes 1848 (MO)                | Bolivia                        | MF502573 | MF502507 | —        | —        | —        | —        | —        |
| 84 | <i>R. tamnoides</i>                              | Raes & Terceros 177 (MO)         | Bolivia                        | KP794435 | MF502508 | MF502646 | MF502704 | —        | MF502773 | MF502843 |
| 85 | <i>R. tamnoides</i>                              | Raes et al. 211 (MO)             | Bolivia                        | MF502574 | MF502509 | MF502647 | MF502705 | —        | MF502774 | MF502844 |
| 86 | <i>R. tamnoides</i>                              | Zardini & Chaparro 50824 (MO)    | Paraguay                       | MF502575 | MF502510 | MF502648 | —        | —        | MF502775 | MF502845 |

<sup>a</sup> = silica gel preserved voucher; all others from herbarium sheets

**Table S2.** Accession table of genomes/transcriptomes used in data-mining analyses.

| No. | Taxon                                       | Type          | Assembly file                                                         | Reference        |
|-----|---------------------------------------------|---------------|-----------------------------------------------------------------------|------------------|
| 1   | <i>Croton tiglium</i> L.                    | Transcriptome | VVPY_Croton_tiglium_-SOAPdenovo-Trans-assembly.fa                     | 1KP Project      |
| 2   | <i>Euphorbia mesembryanthemifolia</i> Jacq. | Transcriptome | LSLA_Euphorbia_mesembryanthemifolia_juv_-SOAPdenovo-Trans-assembly.fa | 1KP Project      |
| 3   | <i>E. mesembryanthemifolia</i>              | Transcriptome | VPDX_Euphorbia_mesembryanthemifolia_mat_-SOAPdenovo-Trans-assembly.fa | 1KP Project      |
| 4   | <i>Jatropha curcas</i> L.                   | Draft genome  | GCF_000696525.1_JatCur_1.0_rna.fna                                    | Sato et al. 2011 |
| 5   | <i>Manihot grahamii</i> Hook.               | Transcriptome | XNLP_Manihot_grahamii_-SOAPdenovo-Trans-assembly.fa                   | 1KP Project      |
| 6   | <i>Plukenetia volubilis</i> L.              | Transcriptome | PlutentiaAssemGADC01000001-GADC01066310.fasta                         | Wang et al. 2012 |
| 7   | <i>Ricinus communis</i> L.                  | Draft genome  | TIGR_castorWGS_release_0.1.cds.fsa                                    | Chan et al. 2010 |
| 8   | <i>R. communis</i>                          | Draft genome  | TIGR_castorWGS_release_0.1.gene.fsa                                   | Chan et al. 2010 |
| 9   | <i>R. communis</i>                          | Transcriptome | PAZJ_Ricinus_communis_1kp_-SOAPdenovo-Trans-assembly.fa               | 1KP Project      |

**Table S3.** List of molecular markers, primer sequence, and amplification/sequencing protocols.

| Name                                     | Primer (5' to 3')                   | Reference                 | Recommended Protocol                                                                                                                                                                                                                                          |
|------------------------------------------|-------------------------------------|---------------------------|---------------------------------------------------------------------------------------------------------------------------------------------------------------------------------------------------------------------------------------------------------------|
| <b>Nuclear DNA (nDNA)</b>                |                                     |                           |                                                                                                                                                                                                                                                               |
| <b>External Transcribed Spacer (ETS)</b> |                                     |                           |                                                                                                                                                                                                                                                               |
| ETS F1                                   | GTT ATG TTT GGY GTT TCG GSA ATG CT  | Designed here             | Amplification and sequencing: ETS Pluk F2 + 18S 5' R<br>Annealing temperature: 52°C                                                                                                                                                                           |
| ETS F2                                   | ATG ATC GTT TGS TTT GGC AGG CTC     | Designed here             |                                                                                                                                                                                                                                                               |
| 18S 5' R                                 | GAA TTA GTT CAT ACT TAC ACA TGC ATG | Designed here             |                                                                                                                                                                                                                                                               |
| <b>Internal Transcribed Spacer (ITS)</b> |                                     |                           |                                                                                                                                                                                                                                                               |
| ITS 5a [F]                               | CCT TAT CAT TTA GAG GAA GGA G       | Stanford et al. 2000      | Amplification and sequencing were done for the Full region (ITS 5a + u4) or in two overlapping fragments: ITS1 (ITS 5a + u2) and ITS2 (ITS p3 + u4). Sometimes ITS p2 and 4 were used as slightly internal sequencing primers.<br>Annealing temperature: 55°C |
| ITS u2 [R]                               | GCG TTC AAA GAY TCG ATG RTT C       | Cheng et al. 2016         |                                                                                                                                                                                                                                                               |
| ITS p2 [R]                               | GCC RAG ATA TCC GTT GCC GAG         | Cheng et al. 2016         |                                                                                                                                                                                                                                                               |
| ITS p3 [F]                               | YGA CTC TCG GCA ACG GAT A           | Cheng et al. 2016         |                                                                                                                                                                                                                                                               |
| ITS u4 [R]                               | RGT TTC TTT TCC TCC GCT TA          | Cheng et al. 2016         |                                                                                                                                                                                                                                                               |
| ITS 4 [R]                                | TCC TCC GCT TAT TGA TAT GC          | White et al. 1990         |                                                                                                                                                                                                                                                               |
| <b>KEA1 intron 11</b>                    |                                     |                           |                                                                                                                                                                                                                                                               |
| KEA1-i11 F                               | GAA TCA GAT ATT GCK CCA TAT CGT G   | Designed here             | Amplification and sequencing: KEA1-i11 F + R<br>Annealing temperature: 55°C                                                                                                                                                                                   |
| KEA1-i11 R                               | AGA AGC TTT GGA TCA ATA GAC ATT C   | Designed here             |                                                                                                                                                                                                                                                               |
| <b>KEA1 intron 17</b>                    |                                     |                           |                                                                                                                                                                                                                                                               |
| KEA1-i17 F                               | AGG TCC TTC ATA AAG TTG GTG CWG A   | Designed here             | Amplification and sequencing: KEA1-i17 F + R<br>Annealing temperature: 65°C                                                                                                                                                                                   |
| KEA1-i17 R                               | GTG CAA GAA CAG CAG CTG CCA ACT G   | Designed here             |                                                                                                                                                                                                                                                               |
| <b>TEB exon 17</b>                       |                                     |                           |                                                                                                                                                                                                                                                               |
| TEB F                                    | GCR AAG AAR TCA AGA ATG GTG CWC G   | Designed here             | Amplification and sequencing: TEB F + R2<br>Annealing temperature: 55°C                                                                                                                                                                                       |
| TEB R1                                   | CTC TCY TCA TCA GGC CAM GAA TCC A   | Designed here             |                                                                                                                                                                                                                                                               |
| TEB R2                                   | ATT SAT AGG ACC CTT CTC ACA GGC A   | Designed here             |                                                                                                                                                                                                                                                               |
| <b>Plastid DNA (cpDNA)</b>               |                                     |                           |                                                                                                                                                                                                                                                               |
| <b>matK (full coding sequence)</b>       |                                     |                           |                                                                                                                                                                                                                                                               |
| matK F1                                  | AAT CCT CTA TCC TTG CTT CAA         | Designed here             | Amplification and sequencing were designed to capture the full coding region in three overlapping fragments, an effective protocol for poor quality DNA. matK Pluk F1 + R1, F2 + R2, and F3 + R3.<br>Annealing temperature: 55°C                              |
| matK R1                                  | CTC ATG AAG AAA GAG TYG TAA TAA A   | Designed here             |                                                                                                                                                                                                                                                               |
| matK F2                                  | AAT ACC TTA CCC CAT CCA TCT A       | Designed here             |                                                                                                                                                                                                                                                               |
| matK R2                                  | ATT GGA ACT ATT GTA TCG AGT TTC     | Designed here             |                                                                                                                                                                                                                                                               |
| matK F3                                  | GTA CGG AGT CAA ATG YTA GAA         | Designed here             |                                                                                                                                                                                                                                                               |
| matK R3                                  | CCT TAC TCG TAT ACT GTA TGA GC      | Designed here             |                                                                                                                                                                                                                                                               |
| <b>ndhF 3' (partial coding sequence)</b> |                                     |                           |                                                                                                                                                                                                                                                               |
| ndhF 1318F                               | GGA TTA ACY GCA TTT TAT ATG TTT CG  | Olmstead and Sweere 1994  | Amplification and sequencing: ndhF 1318F + 2110Ri (or 1703R, to obtain a partial sequence for poorer quality samples)<br>Annealing temperature: 49°C                                                                                                          |
| ndhF 1703R                               | GGC TCC AAT AAA YAA AGT             | Beilstein et al. 2006     |                                                                                                                                                                                                                                                               |
| ndhF 2110Ri                              | TCA ATT ATT CGT TTA TCA A           | Steinmann and Porter 2002 |                                                                                                                                                                                                                                                               |

All PCR amplifications used BIOLASE DNA Polymerase (Bioline) in 15uL reactions. Recipes included: 9.2uL H<sub>2</sub>O; 1.5uL 10x NH<sub>4</sub> Reaction Buffer; 0.6uL 50mM MgCl<sub>2</sub> Solution [2.0mM]; 0.3uL 10mM dNTP Mix [0.2mM]; 0.375uL 10uM Primer (each) [0.25uM]; 1.5uL 1mg/mL Bovine Serum Albumin (BSA; Sigma Aldrich) [0.1 mg/mL]; 0.15uL 5U/uL BIOLASE DNA Polymerase [0.05U/uL]; 1uL Genomic DNA. Nuclear markers included 3uL 5M Betaine (Sigma Aldrich) [1M], in which case H<sub>2</sub>O was reduced to 6.2uL. Thermocycler protocols followed: 3min 94°C Initiation; 35 cycles of (i) 30s 94°C Denaturing, (ii) 1m (see table) Annealing, (iii) 30s 72°C Extension; 10min 72°C Final extension.

**Table S4.** Biogeographical distribution matrix (A = Mexico to NW South America, B = Amazon/Guiana, C = Atlantic Forest, D = Tropical Africa, E = Madagascar, F = SE Asia).

| Taxon                               | A | B | C | D | E | F |
|-------------------------------------|---|---|---|---|---|---|
| <i>Haematostemon guianensis</i>     | 0 | 1 | 0 | 0 | 0 | 0 |
| <i>Plukenetia africana</i>          | 0 | 0 | 0 | 1 | 0 | 0 |
| <i>Plukenetia ankaranensis</i>      | 0 | 0 | 0 | 0 | 1 | 0 |
| <i>Plukenetia brachybotrya</i>      | 0 | 1 | 0 | 0 | 0 | 0 |
| <i>Plukenetia aff. brachybotrya</i> | 0 | 1 | 0 | 0 | 0 | 0 |
| <i>Plukenetia carabiasiae</i>       | 1 | 0 | 0 | 0 | 0 | 0 |
| <i>Plukenetia cf. carolis-vegae</i> | 0 | 1 | 0 | 0 | 0 | 0 |
| <i>Plukenetia conophora</i>         | 0 | 0 | 0 | 1 | 0 | 0 |
| <i>Plukenetia corniculata</i>       | 0 | 0 | 0 | 0 | 0 | 1 |
| <i>Plukenetia decidua</i>           | 0 | 0 | 0 | 0 | 1 | 0 |
| <i>Plukenetia lehmanniana</i>       | 1 | 0 | 0 | 0 | 0 | 0 |
| <i>Plukenetia loretensis</i>        | 0 | 1 | 0 | 0 | 0 | 0 |
| <i>Plukenetia madagascariensis</i>  | 0 | 0 | 0 | 0 | 1 | 0 |
| <i>Plukenetia penninervia</i>       | 1 | 0 | 0 | 0 | 0 | 0 |
| <i>Plukenetia cf. penninervia</i>   | 1 | 0 | 0 | 0 | 0 | 0 |
| <i>Plukenetia polyadenia</i>        | 0 | 1 | 0 | 0 | 0 | 0 |
| <i>Plukenetia serrata</i>           | 0 | 0 | 1 | 0 | 0 | 0 |
| <i>Plukenetia stipellata</i>        | 1 | 0 | 0 | 0 | 0 | 0 |
| <i>Plukenetia supraglandulosa</i>   | 0 | 1 | 0 | 0 | 0 | 0 |
| <i>Plukenetia verrucosa</i>         | 0 | 1 | 0 | 0 | 0 | 0 |
| <i>Plukenetia volubilis</i>         | 0 | 1 | 0 | 0 | 0 | 0 |
| <i>Romanoa tamnoides</i>            | 0 | 0 | 1 | 0 | 0 | 0 |

**Table S5.** Manual dispersal matrix between biogeographical areas (adjacent = 1.0, short-distance dispersal = 0.5, long-distance dispersal = 0.1).

|                      | Mex. to NW<br>South Am. | Amazon/<br>Guiana | Atlantic<br>Forest | Trop. Africa | Madagascar | SE Asia  |
|----------------------|-------------------------|-------------------|--------------------|--------------|------------|----------|
| <b>0 to 35 Mya</b>   | <b>A</b>                | <b>B</b>          | <b>C</b>           | <b>D</b>     | <b>E</b>   | <b>F</b> |
| Mex. to NW South Am. | 1                       | -                 | -                  | -            | -          | -        |
| Amazon/ Guiana       | 1.0                     | 1                 | -                  | -            | -          | -        |
| Atlantic Forest      | 0.1                     | 0.5               | 1                  | -            | -          | -        |
| Trop. Africa         | 0.1                     | 0.1               | 0.1                | 1            | -          | -        |
| Madagascar           | 0.1                     | 0.1               | 0.1                | 0.5          | 1          | -        |
| SE Asia              | 0.1                     | 0.1               | 0.1                | 0.1          | 0.1        | 1        |



**Table S6.** Trait matrix used in phylogenetic regression analysis with seed size. Plants size (0 = slender stems; 1 = robust to thick stems), seedling ecology (0 = light gap or forest edge; 1 = shade avoidance, canopy liana strategy), fruit type/ hypothesized dispersal mechanism (0 = dry, dehiscent/ scatter hoarding rodents; 1 = fleshy, indehiscent/ mammal predation), biome (0 = wet dominant; 1 = dry component), fire tolerance (0 = non-fire adapted; 1 = fire adapted).

| Taxon                                      | Plant size | Seedling ecology | Fruit type/ dispersal | Biome | Fire tolerance |
|--------------------------------------------|------------|------------------|-----------------------|-------|----------------|
| <i>Haematostemon guianensis</i>            | 1          | 0                | 0                     | 0     | 0              |
| <i>Romanoa tamnoides</i>                   | 0          | 0                | 0                     | 0     | 0              |
| <i>Plukenetia africana</i>                 | 0          | 0                | 0                     | 1     | 1              |
| <i>Plukenetia ankaranensis</i>             | 1          | 0                | 0                     | 1     | 0              |
| <i>Plukenetia brachybotrya</i>             | 0          | 0                | 0                     | 0     | 0              |
| <i>Plukenetia</i> aff. <i>brachybotrya</i> | 0          | 0                | 0                     | 0     | 0              |
| <i>Plukenetia carabiasiae</i>              | 1          | 1                | 0                     | 0     | 0              |
| <i>Plukenetia</i> cf. <i>carolis-vegae</i> | 1          | 0                | 0                     | 0     | 0              |
| <i>Plukenetia conophora</i>                | 1          | 1                | 1                     | 0     | 0              |
| <i>Plukenetia corniculata</i>              | 0          | 0                | 0                     | 0     | 0              |
| <i>Plukenetia decidua</i>                  | 1          | 0                | 0                     | 1     | 0              |
| <i>Plukenetia huayllabambana</i>           | 1          | 0                | 0                     | 0     | 0              |
| <i>Plukenetia lehmanniana</i>              | 1          | 0                | 1                     | 0     | 0              |
| <i>Plukenetia loretensis</i>               | 0          | 0                | 0                     | 0     | 0              |
| <i>Plukenetia penninervia</i>              | 0          | 0                | 0                     | 0     | 0              |
| <i>Plukenetia</i> cf. <i>penninervia</i>   | 0          | 0                | 0                     | 0     | 0              |
| <i>Plukenetia polyadenia</i>               | 1          | 1                | 1                     | 0     | 0              |
| <i>Plukenetia serrata</i>                  | 1          | 0                | 1                     | 0     | 0              |
| <i>Plukenetia stipellata</i>               | 0          | 0                | 0                     | 0     | 0              |
| <i>Plukenetia supraglandulosa</i>          | 0          | 0                | 0                     | 0     | 0              |
| <i>Plukenetia verrucosa</i>                | 0          | 0                | 0                     | 0     | 0              |
| <i>Plukenetia volubilis</i>                | 0          | 0                | 0                     | 0     | 0              |

**Table S7.** The best evolutionary model for seed size based on  $\Delta AIC$  and Akaike weights ( $w_i$ ), using the modified *Plukenetia* BEAST chronogram,  $\log_{10}$ (estimated seed volume), and the fitContinuous function in GEIGER.

| Model              | AIC <sub>c</sub> | $\Delta AIC$ | $w_i$     |
|--------------------|------------------|--------------|-----------|
| Brownian motion    | 50.03442         | 0.0          | 0.6584417 |
| Ornstein-Uhlenbeck | 52.73257         | 2.69815      | 0.1708530 |
| Early Burst        | 52.73430         | 2.69988      | 0.1707053 |
